1 **Frequent sugar feeding behavior by *Aedes aegypti* in Bamako, Mali makes**  
2 **them ideal candidates for control with attractive toxic sugar baits (ATSB)**

3  
4 Fatoumata Sissoko<sup>1\*</sup>, Amy Junnila<sup>2</sup>, Mohamad M. Traore<sup>1</sup>, Sekou F. Traore<sup>1</sup>, Seydou Doumbia<sup>1</sup>,  
5 Seydou Mamadou Dembele<sup>1</sup>, Yosef Schlein<sup>2</sup>, Petrányi Gergely<sup>6</sup>, Rui-De Xue<sup>7</sup>, Kristopher L.  
6 Arheart<sup>3</sup>, Edita E. Revay<sup>4</sup>, Vasiliy D. Kravchenko<sup>5</sup>, John C. Beier<sup>3</sup>, Gunter C. Müller<sup>1,2</sup>

7  
8 \*In memory of Fatoumata Sissoko.

9 <sup>1</sup> Malaria Research and Training Center, Faculty of Medicine, Pharmacy and Odonto-  
10 Stomatology, University of Sciences, Techniques and Technology of Bamako, Bamako, Mali

11 <sup>2</sup> Department of Microbiology and Molecular Genetics, IMRIC, Kuvim Centre for the Study of  
12 Infectious and Tropical Diseases, Faculty of Medicine, Hebrew University, Jerusalem, Israel

13 <sup>3</sup> Department of Public Health Sciences, Miller School of Medicine, University of Miami,  
14 Miami, Florida, USA

15 <sup>4</sup> Department of Anatomy and Cell Biology, Bruce Rappaport Faculty of Medicine, Technion,  
16 Haifa, Israel

17 <sup>5</sup> Department of Zoology, Tel Aviv University, Tel Aviv, Israel

18 <sup>6</sup> Zoologische Staatssammlung München, Germany

19 <sup>7</sup> Anastasia Mosquito Control District, 500 Old Beach Road, St. Augustine, FL, USA

20

21 **Abstract**

22 **Background**

23 Current tools and strategies are not sufficient to reliably address threats and outbreaks of  
24 arboviruses including Zika, dengue, chikungunya, and yellow fever. Hence there is a growing  
25 public health challenge to identify the best new control tools to use against the vector *Aedes*  
26 *aegypti*. In this study, we investigated *Ae. aegypti* sugar feeding strategies in Bamako, Mali, to  
27 determine if this species can be controlled effectively using attractive toxic sugar baits (ATSB).

28

### 29 **Methodology/Principal findings**

30 We determined the relative attraction of *Ae. aegypti* males and females to a variety of sugar  
31 sources including flowers, fruits, seedpods, and honeydew in the laboratory and using plant-  
32 baited traps in the field. Next, we observed the rhythm of blood feeding versus sugar feeding  
33 activity of *Ae. aegypti* in vegetation and in open areas. Finally, we studied the effectiveness of  
34 spraying vegetation with ATSB on *Ae. aegypti* in sugar rich (lush vegetation) and in sugar poor  
35 (sparse vegetation) urban environments.

36 Male and female laboratory sugar feeding rates within 24 h, on 8 of 16 plants offered were over  
37 80%. The survival rates of mosquitoes on several plant sources were nearly as long as that of  
38 controls maintained on sucrose solution. In the field, females were highly attracted to 11 of 20  
39 sugar sources, and 8 of these were attractive to males. Peak periods of host attraction for blood-  
40 feeding and sugar feeding in open areas were nearly identical and occurred shortly after sunrise  
41 and around sunset. In shaded areas, the first sugar-seeking peak occurred between 11:30 and  
42 12:30 while the second was from 16:30 to 17:30. In a 50-day field trial, ATSB significantly  
43 reduced mean numbers of landing / biting female *Ae. aegypti* in the two types of vegetation. At  
44 sugar poor sites, the mean pre-treatment catch of 20.51 females on day 14 was reduced 70-fold to

45 0.29 on day 50. At sugar rich sites, the mean pre-treatment catch of 32.46 females on day 14 was  
46 reduced 10-fold to a mean of 3.20 females on day 50.

47

## 48 **Conclusions/Significance**

49 This is the first study to show how the vector *Ae. aegypti* depends on environmental resources of  
50 sugar for feeding and survival. The demonstration that *Ae. aegypti* populations rapidly collapsed  
51 after ATSB treatment, in both sugar rich and sugar poor environments, is strong evidence that  
52 *Ae. aegypti* is sugar-feeding frequently. Indeed, this study clearly demonstrates that *Ae. aegypti*  
53 mosquitoes depend on natural sugar resources, and a promising new method for vector control,  
54 ATSB, can be highly effective in the fight against *Aedes*-transmitted diseases.

## 55 **Author summary**

56 *Aedes aegypti* are notoriously difficult to control since their ubiquitous man-made and  
57 natural breeding sites, in various geographical regions, include almost any receptacle that can  
58 hold water. These diurnal mosquitoes are anthropophilic, a preference that promotes their role as  
59 vectors of many arboviruses including Zika, dengue, chikungunya, and yellow fever. With the  
60 exception of yellow fever, there are no vaccines against any of these arboviruses so that use of  
61 personal protective measures and mosquito vector control are the only means of prevention.  
62 Disease burdens in most endemic areas are not sufficiently reduced by various integrated vector  
63 management (IVM) strategies, hence there is a need for new control tools to complement the  
64 common strategies. Control by Attractive Toxic Sugar Baits (ATSB) appears to be an ideal  
65 candidate for this purpose.

66 The results of this study support this proposition. They demonstrate that *Ae. aegypti* in  
67 their urban environments in Mali are attracted to and frequently feed on staple diet that includes

68 a variety of flowers, fruits and seed pods. Therefore, *Ae. aegypti* is a suitable candidate for  
69 control with ATSB. Moreover, the experiments with ATSB, in sparse vegetation or with  
70 competitor plant attractants in rich vegetation, demonstrated that ATSB treatment can cause a  
71 drastic reduction of *Ae. aegypti* populations.

## 72 **Introduction**

73 *Aedes aegypti* are vectors for several significant arboviruses including Zika, dengue,  
74 chikungunya, and yellow fever [1-4]. Apart from yellow fever, there are no approved vaccines in  
75 widespread use against these viruses, therefore public health efforts are reliant on effective  
76 vector control methods [5,6]. Common strategies for the control of *Ae. aegypti* include residual  
77 spraying targeted to resting sites [7], space spraying indoors [8], larval control with conventional  
78 pesticides or lethal ovi-traps [9,10], and the use of personal protective measures.

79 However, the use of these methods is insufficient for achieving significant reductions in  
80 disease burdens thus new control tools are required [11,12]. Methods that are considered  
81 promising for this purpose by the WHO and require further field testing include: the  
82 Incompatible Insect Technique, the sterile insect technique, vector traps, and attractive toxic  
83 sugar baits [13, 14].

84 For many years, based on published work and experience in rearing laboratory  
85 mosquitoes, it was common knowledge that mosquitoes must feed on sugar to obtain the energy  
86 necessary for survival [15, 16]. However, the observation that *Ae. aegypti* could take blood and  
87 convert it to triglycerides and glycogen that provide energy [17] led to subsequent observations  
88 that female *Ae. aegypti* in the field were taking multiple blood meals within a single gonotrophic  
89 cycle [18-20]. Accordingly, *Ae. aegypti* may be less dependent on sugar for energy than other  
90 mosquito species and presumably rarely feed on sugar [18, 21, 22]. This is not necessarily a

91 comprehensive rule since there are observations that *Ae. aegypti* are frequent sugar feeders,  
92 given the right environment. It was demonstrated that in Chiapas, Mexico, in an area with  
93 flowering plants, *Ae. aegypti* commonly fed on nectars; 8 to 21% of the mosquitoes tested  
94 positive for sugar using the anthrone test [23]. In the laboratory [24], it was observed that male  
95 and female *Ae. aegypti* displayed two peaks in sugar feeding; a small morning peak with 16 to  
96 18% of mosquitoes sugar-feeding and a larger evening peak with 40 to 42% sugar-feeding  
97 mosquitoes. In another study in Duran, Ecuador, 56.8% of the *Ae. aegypti* females were marked  
98 as sugar positive following feeding on sucrose solution colored with food dye [25]. It has been  
99 concluded that the availability of sugar sources in the local environment affects mosquito  
100 longevity and thus it is a key regulator of mosquito population dynamics and therefore, of their  
101 vectorial capacity [15, 26]. The evidence above indicates that that the success of *Ae. aegypti*, at  
102 least in some regions, also depends on the presence of natural sugar sources. Attractive toxic  
103 sugar bait methods (ATSB) use the staple sugar feeding behavior of mosquitoes in nature for  
104 their control. The potential and efficiency of this method have been demonstrated in several  
105 experiments with various mosquito genera and species [27-34]. The observations on the sugar  
106 feeding behavior of *Ae. aegypti* indicate the potential of also using ATSB methods for the control  
107 of this species. The initial requirement for assessing the possibility of using ATSB against *Ae.*  
108 *aegypti* is the study of the sugar feeding behavior of the species on natural sugar sources in the  
109 experimental region. This was the basic purpose of this study which was investigated in the  
110 following manner: 1) in the laboratory, we observed whether *Ae. aegypti* groups were feeding on  
111 potentially edible sources of sugar, including flowers, fruits, seedpods, and honeydew, both  
112 available in the mosquito's environment and some known to be highly attractive to other species;  
113 2) We repeatedly offered single plant-sugar sources to mosquitoes as exclusive diets, one species

114 per series of mosquitoes, and monitored the mortality rate in the mosquitoes; 3) We used plant  
115 baited traps in the field in and around the urban centers of Bamako, Mali and estimated plant  
116 attraction by comparing their catches of mosquitoes; 4) We determined the proportion of sugar  
117 fed mosquitoes and estimated sugar quantities in *Ae. aegypti* males and females from sugar rich  
118 and sugar poor urban neighborhoods; and 5) Finally, we tested the effect of ATSB treatment,  
119 estimated by the number of mosquitoes landing on volunteers, on *Ae. aegypti* population size in  
120 sugar rich and sugar poor areas in Bamako.

121

## 122 **Methods**

### 123 **Identification of plants that are potential sugar sources for *Ae. aegypti***

124 Dominant plants at the study sites were defined with the assistance of the staff of the  
125 department of Traditional Medicine, School of Medicine and Dentistry, University of Sciences  
126 and Technology of Bamako, Mali.

127

### 128 **Mosquitoes for laboratory experiments**

129 The *Ae. aegypti* colony used in the laboratory trials were established from the F1  
130 generation of field caught mosquitoes to simulate the field breed as closely as possible. They  
131 were caught close to the campus of the campus of the University of Sciences, Techniques and  
132 Technology of Bamako, Mali, which is inside the city, and kept at their insectary under the  
133 following conditions:  $27 \pm 3^{\circ}\text{C}$ , relative humidity  $70 \pm 10\%$ , and photoperiod 12:12 hours  
134 light:dark. Adults for experiments were maintained on 10% sucrose solution and then starved for  
135 24 h before the beginning of experiments. Fresh batches of 5 day old mosquitoes were used for  
136 each experiment.

137

## 138 **Testing for sugar**

139           The sugar content in the gut of mosquitoes was determined by a modified cold anthrone  
140 test for fructose [35] and sugar amounts were visually scored by the intensity of the blue colour  
141 reaction under a dissecting microscope. Very light blue colour was defined as class I; darker blue  
142 colour in the reaction fluid was class II; class III was darker, and very intense blue was class IV  
143 (Fig 1).

144

145 **Fig 1. Microtitre plate with anthrone tested samples.** Class I through IV colour intensities as  
146 well as negative control wells are shown.

147

## 148 **Laboratory experiments**

149 **Sugar feeding of *Ae. aegypti* exposed to potential sugar sources for 24 h.** Assays were carried  
150 out with cohorts of 30 female and 30 male *Ae. aegypti* placed together for 24 h in 50 × 50 cm<sup>2</sup>  
151 mosquito cages that contained one of the following: fruits of *Carica papaya* (papaya), *Mangifera*  
152 *indica* (mango), *Cucumis melo* (honeydew melon), leaves with extra-floral nectar of *Ricinus*  
153 *communis*, branches of *Lantana camara* soiled with honeydew from the aphid *Aphis gossypii*,  
154 and flowering *Prosopis juliflora*, *Acacia macrostachya*, *Acacia salicina*, *Lantana camara*,  
155 *Galphimia gracilis* and *Bougainvillia glabra*. Other types of offered sugar source were  
156 undamaged seedpods of *Piliostigma reticulatum*, infested *P. reticulatum* seedpods perforated by  
157 an unknown species of *Microlepidoptera* that were oozing sweet liquid, cut 20 cm segments of  
158 *Saccharum officinarum* (sugar cane) with the ends tightly sealed with parafilm, and broken /  
159 crushed tissue of similar segments of sugar cane. The general pattern was to offer either 4-5

160 branches of a target plant with stems in a beaker of distilled water, cut pieces of fruit (100 g), or  
161 complete seed pods (100 g). Additional tests were conducted on *Lantana camara* branches  
162 coated with ATSB solution (active ingredient: microencapsulated garlic oil) and ATSB offered  
163 in bait stations (active ingredient: dinotefuran). The bait stations were experimental prototypes  
164 with a thin protective membrane cover and were supplied from an ongoing Innovative Vector  
165 Control Consortium (IVCC) project carried out by Westham Ltd., Tel Aviv Israel.

166 A 10% sucrose solution and water soaked-cotton swabs served as the control diet and  
167 were made available in all cages. Each experiment was repeated 6 consecutive times. Mosquitoes  
168 were killed with CO<sub>2</sub> and then either tested immediately for sugar by modified anthrone test or  
169 frozen at -70°C until anthrone tests could be performed.

170

171 **Survival of *Ae. aegypti* females with continuous access to different sugar sources.** Groups of  
172 100 *Ae. aegypti* females in 50 x 50 cm cages, were allowed to feed on only 1 type of plant and  
173 their survival was monitored for 31 days. Plants were replaced daily, and water-soaked cotton  
174 swabs were generally available. Dead mosquitoes were removed daily. The 11 test diets were  
175 extra-floral nectar on foliage of non-flowering *Ricinus communis*, flowers of *Bougainvillia*  
176 *glabra*, *Prosopis juliflora*, or *Galphimia gracilis*, fruits of *Mangifera indica* and *Cucumis melo*,  
177 seed pods of *Piliostigma reticulatum*, either undamaged or perforated by pests and oozing juice,  
178 intact or broken / crushed stems of *Saccharum officinarum*, and honeydew (*Aphis gossypii*)  
179 soiled branches of non-flowering *Lantana camara*. Controls received 10% sucrose solution and  
180 water or water only. Each experiment was repeated 6 consecutive times.

181

182 **Field experiments**



183 **Field sites**

184 All studies took place in Bamako, the capital and largest city of Mali, with ~ 2 million  
185 inhabitants. The city spreads out on both banks of the River Niger and annual flooding limits  
186 building on the banks which are a patchwork of wetlands, parkland, agricultural fields and  
187 forested areas. Some of the richer neighbourhoods and hotel districts include buildings with  
188 parklands or small vegetable fields. Bamako has tropical annual wet and dry periods. The hottest  
189 months are March, April, and May (hottest average temperature 32.4 °C). The average  
190 temperature in the coldest month (December) is 25.1°C. Total annual rainfall averages 1098.5  
191 mm; the rainy period is May through September, with peak rain occurring in August/September.  
192 The driest periods are late October through April.

193 ‘Sugar rich’ and ‘sugar poor’ sites for field studies were chosen around Bamako and were  
194 identified primarily by land use which was determined by scouting areas by foot with trained  
195 botanists who could estimate flowering vegetation cover. Urban areas with the lush vegetation of  
196 irrigated parkland and gardens containing  $\geq 50\%$  flowering vegetation, were defined as ‘sugar  
197 rich’ and densely populated urban neighborhoods with sparse vegetation containing  $< 5\%$   
198 flowering vegetation, were defined as ‘sugar poor’.

199

200 **Attraction of *Ae. aegypti* to plant baited glue net traps (GNT's) in the field.** Experiments  
201 were carried out for 10 consecutive days at the end of the dry season in 2016 along the shady  
202 margins of a forest gallery parallel to the River Niger.

203 Specifically designed glue net traps (GNTs) [30], were used to test attraction to plants.  
204 Briefly, cut bottom halves of 1.5 L plastic bottles were set in the ground, with the margins  
205 protruding to the surface, and filled with water. Dark green, rigid plastic netting, with mesh size

206 0.8 cm x 0.2 cm, was cut into 70 × 70 cm squares, rolled into cylinders, and each was put  
207 vertically above one of the cut bottles with the water, fastened to the ground with pegs and fitted  
208 with mesh covers. About 0.5 kg of test plant material was fixed in the center of a cylinder that  
209 was then covered and coated externally with glue (Tangle Foot, Tel Aviv, Israel). The different  
210 plant baits are listed in Table 2A and 2B. Controls were water-soaked sponges, empty traps, or  
211 naked *L. camara* branches, sprayed with either 10% sucrose solution or ATSB solution used in  
212 this study. Mosquitoes caught in the glue were removed, counted, and stored in 70% ethanol for  
213 identification. Each morning of the 10 day monitoring period, the baits were replaced, cylinders  
214 were repainted with glue, and trap locations were rotated to avoid location bias.

215

216 **Timing of host-seeking and sugar-seeking activities in the field.** The rhythm of the search for  
217 blood meals was shown by the number of landing/biting events on human volunteers in the field,  
218 in 30 min. intervals, for 18 hours (05:00 h to 23:00 h). This was done at 6 separate sites: 3 shady,  
219 3 open and mosquitoes on volunteers from each group of sites were pooled and averaged.  
220 Mosquitoes were collected with aspirators near the shady margins of the forest gallery with thick  
221 undergrowth along the River Niger, and in open, sun-exposed grassland 30 m away from the  
222 trees. The United States Environmental Protection Agency guidelines and protocols for the use  
223 of human volunteers in landing catch experiments were carefully followed [36]. Three  
224 volunteers, 2 males and 1 female, all professional entomologists/medics participated in this  
225 study. As part of the consent process, the participants in all human trials were fully advised of  
226 the nature and objectives of the test and the potential health risks from exposure to mosquito  
227 bites. According to EPA regulations, they were required to avoid alcohol, caffeine, and fragrance  
228 products (e.g., perfume, cologne, hairspray, lotion, etc.) during the entire test period. For the

229 tests, volunteers were wearing long trousers and long-sleeved shirts as protection against  
230 mosquito bites. One leg of the trousers was rolled up to expose the skin used as the test area.  
231 Volunteers were seated motionless in chairs with the exposed leg extended while observation,  
232 counting and recording of mosquitoes was made by assistants. The distance between the  
233 volunteers was 20 m and their locations were rotated through 9 stations every 30 min. to  
234 eliminate positional bias.

235 The rhythm of activity in the search for sugar meals was observed in both shaded and  
236 open areas by counting the catches of 9 GNTs in each type of area (18 total) baited with highly  
237 attractive flowering *P. juliflora* branches in 30 min. intervals, for 18 hours (05:00 h to 23:00 h).  
238 The baits were replaced by fresh branches at each time interval.

239

240 **Comparing sugar feeding rates of *Ae. aegypti* in ‘sugar rich’ and ‘sugar poor’ habitats.** The  
241 sugar-fed status of blood searching mosquitoes was observed. Catches on volunteers were  
242 carried out in the morning (11:00 h – 12:00 h) at ‘sugar poor’ and ‘sugar rich’ sites (Fig 2). Three  
243 volunteers, 2 males and 1 female, all professional entomologists/medics participated in this study  
244 and set-up was as described under “Timing of host seeking activity in the field”.

245

246 **Fig 2. Pictures of sugar rich and sugar poor habitats in Bamako neighbourhoods. A and B)**

247 Densely populated urban areas with sparse vegetation (<5% flowering), **C and D)** Lush  
248 vegetation of irrigated gardens and parkland with areas of  $\geq 50\%$  flowering vegetation.

249

250 Sweep- net and aspirator (battery powered vacuum aspirators, John W. Hock, Gainesville, FL)  
251 catches for periods of 30 min. were also carried out in nearby vegetation. Captured mosquitoes  
252 were put on ice or in cages immediately, and random subsamples were tested for sugar [35].

253 Mosquito samples taken were either processed within 1 hour of collection or 6 hours after  
254 collection to assess the rate of sugar digestion from the guts of the mosquitoes. This process is  
255 expressed by the loss of positive anthrone reactions [35] with time. Random samples of 100  
256 female and 100 male mosquitoes were tested from each site and for each processing time point.  
257 Sampling continued on consecutive days until these numbers were obtained, 4 days for the sugar  
258 rich area and 7 for the sugar poor area.

259

260 **ATSB experiments.** The ATSB method was field tested in 50 day experiments (Fig 2) in  
261 parklands and irrigated gardens ('sugar rich') and also in dry residential areas ('sugar poor') of  
262 Bamako from mid-June to the end of July 2016 (Fig 3).

263

264 **Fig 3. Local weather conditions in Bamako during June and July 2016.** Rain occurred during  
265 the study, and two treatments were applied at the sites to avoid a "wash off" effect.

266

267 A total of 12 sites, 6 'sugar rich' and 6 'sugar poor' areas of ~ 1 ha<sup>2</sup> were selected. Three of each  
268 type were untreated controls and 3 in their vicinity received ATSB spray treatment. The effect of  
269 ATSB treatment was evaluated by recording biting / landing rates of female *Ae. aegypti* on  
270 human volunteers. The procedure was as described under "timing of host-seeking activity" with  
271 the same consent process [36]. The volunteers were placed in the center of each plot and each of  
272 them was moved among 3 monitoring stations per site that amounted to 9 repetitions per site.

273 ATSB was sprayed mainly on broad-leafed shrubs, bushes, and small trees up to 1.5 m high.  
274 Plants with flowers or fruit were not treated to minimize the impact on non-target organisms  
275 [37]. At the sugar poor sites, for the lack of suitable vegetation, artificial structures and buildings  
276 were sprayed. Treated areas were sprayed twice, once on day 15 and again on day 32 of the  
277 experiments.

278  
279 **ATSB formulations.** For the ATSB spray trials, we used ATSB Mosquito Bait Concentrate,  
280 with the active ingredient of microencapsulated garlic oil (Universal Pest Solutions, Dallas TX,  
281 USA). The material was used according to label instructions, the concentrate was diluted 1:3,  
282 and was applied with a backpack sprayer on vegetation or on suitable artificial structures to  
283 cover 5% of the targeted area (four plots of 1 ha 500m<sup>2</sup> were treated). Perimeter treatments were  
284 used at sites with continuous lines of vegetation (e.g. hedges, other shrubs) or extensive  
285 landscaping. ATSB was applied to vegetation in a continuous band measuring about 0.5 m wide,  
286 between 0.3 m to 1.5 m above the ground, and to the point of runoff at a rate of 500 to 600 ml of  
287 mixture per 30 m. Spot-treatments were applied to single shrubs, small patches of vegetation or  
288 artificial structures at least 30 cm above the ground in patches of approximately 1 m<sup>2</sup> to the point  
289 of runoff. The spot applications were repeated, if possible, every 4 m.

290

## 291 **Statistical analysis**

292 For the statistics reported in Table 1, we used a generalized linear model for a Poisson  
293 distributed outcome, number of female and male mosquitos. Separate models were employed for  
294 females and males. The independent variable was plant. We present model means and standard

295 deviations along with raw and Dunnett adjusted p-values for comparing means with the control,  
296 ATSB on *L. camara* branches.

297

298 Figures 4 A and B present survival plots for a series of female *Ae. aegypti* that were each  
299 exposed for 31 days to two types of plants. We used Kaplan-Meyer statistics to compute the data  
300 for these figures.

301

302 Tables 2 A and B report the mean number of *Ae. aegypti* caught overnight by GNTs each with a  
303 different bait of fruit, seedpods, or flowers. We used a generalized linear model for a Poisson  
304 distributed outcome, number of female and male mosquitos. Overdispersion was evident;  
305 therefore, we changed to a negative binomial model that employs a scale parameter to adjust the  
306 model for overdispersion. Separate models were analyzed for females and males. The  
307 independent variable was plant. We present model means and standard deviations along with raw  
308 and Dunnett adjusted p-values for comparing means with the control, an empty trap. The data for  
309 Figures 4 A and B come from the data used in the analysis of Tables 2 A and B.

310

311 The percentage of *Ae. aegypti* with different amounts of sugar in the gut is reported in Table 3.

312 The mosquitos were caught at 'sugar rich' and 'sugar poor' sites on human volunteers or with  
313 sweep-nets in the vegetation. We totaled the number of sugar positive mosquitos in each  
314 category as determined by anthrone testing for each time, sugar status, and catch type and then  
315 divided by the total number of sugar positive mosquitos. The data for Figures 5 A and B come  
316 from the data analyzed for Table 3.

317

318 Table 4 presents the mean number of *Ae. aegypti* following ATSB treatment at sugar poor and  
319 sugar rich sites. The data is the number of female mosquitos landing on human volunteers  
320 compared to their frequency at untreated control sites. We applied a generalized linear mixed  
321 model analysis to the mean catch for control and treatment period in each sugar rich and sugar  
322 poor control and experimental groups. Each mean came from nine catches: three volunteers each  
323 providing landing catches in three different monitoring stations. The Shapiro-Wilk test  
324 determined that the mean counts were normally distributed. The model included fixed effects for  
325 group (sugar rich and sugar poor), treatment period (control [days 1-14], ATSB treatment 1 [days  
326 16-31], and ATSB treatment 2 [days 35-50]), condition (control and experimental), plus all two-  
327 way interactions and the three-way interaction. Appropriate error terms for the fixed effects are  
328 random effects. The error term for the group effect was site nested within group. The treatment  
329 and condition effects were repeated measures within the groups. Therefore, the error term for  
330 treatment and group x treatment was group x treatment x site nested within group. Likewise, the  
331 error term for condition and condition x group was condition x group x site nested within group.  
332 The error term for treatment x condition and group x treatment x condition was treatment x  
333 condition x site nested within group. Means and standard errors are reported for the group x  
334 treatment x condition interaction. We report *p*-values and Bonferroni adjusted *p*-values for  
335 comparisons between control and experimental means at each treatment level for sugar poor and  
336 sugar rich groups as well as comparisons between sugar rich and sugar poor means at each  
337 treatment level for control and experimental groups. Finally, we report *p*-values and Dunnett  
338 adjusted *p*-values for comparisons between control and the two ATSB levels for sugar rich and  
339 poor experimental and control groups. The data for this analysis was used to produce Figures 7 A  
340 and B.

341 Plants in field experiments were also ranked by being assigned an attraction index (AI),  
 342 which was calculated by the following equation: average catch with the plant bait (PB) ÷ by the  
 343 average catch with the empty trap control (ET); PB/ET = AI.

344

## 345 Results

### 346 Sugar feeding of *Ae. aegypti* exposed to potential sugar sources for 24 h

347 Sugar feeding rates for females on 8 out of 16 of the sugar sources were high, ranging  
 348 from 81.67% on *Mangifera indica* (mango), to 93.89% on *Cucumis melo* (honeydew melon).  
 349 Males fed avidly on 8 sugar sources. Exposure to fluids oozing from decomposing seedpods of  
 350 *P. reticulatum* resulted in 80% sugar positive mosquitoes and the highest result was the 97.22%  
 351 of positive specimens in the series that received *C. papaya* (papaya). Also, 88.89% of the  
 352 females and 95.00% of the males in the ATSB on *L. camara* group were sugar positive after the  
 353 exposure (Table 1).

354

355 **Table 1. Mean numbers ±SE over replicate cages in six experiments, in descending order,**  
 356 **of sugar positive mosquitoes after 24 h exposure to a single plant-sugar source.**

| Females                                 |       |      |            |       | Males                                   |       |      |            |       |
|-----------------------------------------|-------|------|------------|-------|-----------------------------------------|-------|------|------------|-------|
| Species                                 | Mean  | ±SE  | % Positive | *p    | Species                                 | Mean  | ±SE  | % Positive | *p    |
| <i>C. melo</i> F                        | 28.17 | 2.17 | 93.89%     | 0.621 | <i>C. papaya</i> F                      | 29.17 | 2.21 | 97.22%     | 0.830 |
| <i>A. macrostachya</i> FL               | 28.00 | 0.91 | 93.00%     | 0.601 | <sup>§</sup> ATSB on <i>L. camara</i> G | 28.50 | 2.18 | 95.00%     | N/A   |
| <i>P. juliflora</i> FL                  | 27.83 | 0.70 | 92.78%     | 0.700 | <i>P. juliflora</i> FL                  | 28.00 | 2.16 | 93.33%     | 0.871 |
| <sup>§</sup> ATSB on <i>L. camara</i> G | 26.67 | 1.33 | 88.89%     | N/A   | <i>A. macrostachya</i> FL               | 27.83 | 2.15 | 92.78%     | 0.828 |
| <i>A. salicina</i> FL                   | 26.50 | 2.10 | 88.33%     | 0.956 | <i>G. gracilis</i> FL                   | 26.67 | 2.11 | 88.89%     | 0.547 |
| <i>G. gracilis</i> FL                   | 25.50 | 2.06 | 85.00%     | 0.693 | <i>A. salicina</i> FL                   | 26.50 | 2.10 | 88.33%     | 0.511 |
| <i>C. papaya</i> F                      | 25.33 | 2.06 | 84.44%     | 0.652 | <i>M. indica</i> F                      | 25.33 | 2.06 | 84.44%     | 0.293 |
| <i>P. reticulatum</i> (oozing juice) F  | 24.67 | 2.03 | 82.22%     | 0.496 | <i>C. melo</i> F                        | 25.17 | 2.05 | 83.89%     | 0.268 |
| <i>M. indica</i> F                      | 24.50 | 2.02 | 81.67%     | 0.460 | <sup>§</sup> Sucrose 10% on cotton      | 24.16 | 2.01 | 85.56%     | 0.147 |



|                                               |       |      |        |        |                                               |       |      |        |        |
|-----------------------------------------------|-------|------|--------|--------|-----------------------------------------------|-------|------|--------|--------|
| <sup>§</sup> Sucrose 10% on cotton            | 24.17 | 2.01 | 80.56% | 0.393  | <i>P. reticulatum</i> (oozing juice) F        | 24.00 | 2.00 | 80.00% | 0.132  |
| <sup>§</sup> ATSB Bait Station                | 18.83 | 1.77 | 62.78% | 0.006  | <i>L. camara</i> FL                           | 18.65 | 1.76 | 62.22% | 0.010  |
| <i>L. camara</i> FL                           | 18.81 | 1.75 | 61.11% | 0.003  | <i>L. camara</i> with <i>A. gossypii</i> G, H | 13.96 | 1.53 | 46.67% | <0.001 |
| <i>L. camara</i> with <i>A. gossypii</i> G, H | 14.50 | 1.56 | 48.33% | <0.001 | <i>R. communis</i> G, E                       | 13.31 | 1.49 | 45.00% | <0.001 |
| <i>S. officinarum</i> (broken) G              | 13.17 | 1.48 | 43.89% | <0.001 | <sup>§</sup> ATSB Bait Station                | 12.97 | 1.47 | 43.33% | <0.001 |
| <i>R. communis</i> G, E                       | 4.67  | 0.99 | 15.88% | <0.001 | <i>S. officinarum</i> (broken) G              | 11.29 | 1.37 | 37.78% | <0.001 |
| <i>B. glabra</i> FL                           | 4.62  | 0.88 | 15.56% | <0.001 | <i>B. glabra</i> FL                           | 3.23  | 0.73 | 11.11% | <0.001 |
| <i>P. reticulatum</i> (intact) F              | 0.67  | 0.33 | 2.22%  | <0.001 | <i>P. reticulatum</i> (intact) F              | 0.58  | 0.31 | 2.22%  | <0.001 |
| <i>N. glauca</i> FL                           | 0.50  | 0.29 | 1.67%  | <0.001 | <i>N. glauca</i> FL                           | 0.32  | 0.23 | 1.11%  | <0.001 |
| <i>S. officinarum</i> (intact) G              | 0.33  | 0.24 | 1.11%  | <0.001 | <i>S. officinarum</i> (intact) G              | 0.25  | 0.21 | 0.56%  | <0.001 |

\*Compared to positive control ATSB on *L. camara* branches

F: Fruit, seedpod

<sup>§</sup>Positive control

FL: Blossom

N/A Not applicable

G: Branches

H: Honeydew on branches (*Aphis gossypii*)

E: Extra-floral nectar

357

358

### 359 **Survival of *Ae. aegypti* females with continuous access to different sugar sources**

360 Of the different female groups fed exclusively for 31 days on one diet, the negative control group  
 361 of 100 starved and thirsty females died within 4 days. Mosquitoes survived for up to 6 days on  
 362 water alone and the provision of 10% sucrose solution allowed 68% survival of up to 31 days.  
 363 Among the plant diet series, the survival proportion by day 31 was the highest (85.89%) in the  
 364 group fed on *P. juliflora* whereas the lowest survival rate of 5.00% was in the group that  
 365 received intact seedpods of *P. reticulatum* (Fig 4A and 4B).

366

367 **Fig 4. Survival in a series of female *Ae. aegypti* that were each exposed for 31 days to one**  
 368 **type of plant. (A)** Survival after exposure to branches with plant blossoms. *Ricinus communis*  
 369 baits were branches with extra-floral nectaries. **(B)** Sugar source types other than blossoms.

370

371 **Attraction of *Ae. aegypti* to plant baited glue net traps (GNTs) in the field**

372 Females were attracted to 11 of the 23 baits. The highest mean catches of 18.70, 13.70,  
 373 11.20, and 9.80 specimens were from traps baited with *P. juliflora*, *A. macrostachya*, *A. salicina*,  
 374 *M. indica*, and ATSB on branches, respectively. Males were attracted to 8 baits, the 4 most  
 375 attractive being *P. juliflora* (12.90), *A. macrostachya* (10.20), *A. salicina* (7.60), and the positive  
 376 control of ATSB coated branches (6.50) (Tables 2A and 2B).

377

378 **Table 2. Mean number ( $\pm$  SE) of *Ae. aegypti* caught overnight by GNTs each with a**  
 379 **different bait of fruit, seedpods, or flowers. (A) Females. (B) Males.**

380 **Table 2A.**

| Origin           | Condition     | Species                                  | Mean  | $\pm$ SE | Attraction Index | P Value | Sig. |
|------------------|---------------|------------------------------------------|-------|----------|------------------|---------|------|
| Ornamental       | Flowering     | <i>P. juliflora</i>                      | 18.70 | 8.18     | 37.40            | <0.001  | *    |
| Native           | Flowering     | <i>A. macrostachya</i>                   | 13.70 | 6.02     | 27.40            | <0.001  | *    |
| Ornamental       | Flowering     | <i>A. salicina</i>                       | 11.20 | 5.57     | 22.40            | <0.001  | *    |
| Positive control | Non-flowering | ATSB on <i>L. camara</i> branches        | 9.80  | 4.80     | 19.60            | <0.001  | *    |
| Agricultural     | Flowering     | <i>M. indica</i> (Mango)                 | 5.60  | 2.99     | 11.20            | <0.001  | *    |
| Agricultural     | Fruit         | <i>C. papaya</i> (Papaya)                | 4.90  | 3.00     | 9.80             | <0.001  | *    |
| Agricultural     | Fruit         | <i>M. indica</i>                         | 4.30  | 2.67     | 8.60             | <0.001  | *    |
| Agricultural     | Fruit         | <i>C. melo</i>                           | 3.70  | 2.41     | 7.40             | 0.001   | *    |
| Native           | Flowering     | <i>R. communis</i>                       | 3.00  | 2.05     | 6.00             | 0.002   | *    |
| Aphids           | Non-flowering | <i>L. camara</i> with <i>A. gossypii</i> | 2.60  | 1.84     | 5.22             | 0.011   | *    |
| Ornamental       | Flowering     | <i>G. gracilis</i>                       | 2.20  | 1.69     | 4.40             | 0.031   | *    |
| Ornamental       | Non-flowering | <i>P. juliflora</i>                      | 1.61  | 0.99     | 3.22             | 0.154   | NS   |
| Negative control | Cotton Towel  | Water                                    | 1.60  | 0.97     | 3.20             | 0.154   | NS   |
| Negative control | Cotton Towel  | Sucrose 10%                              | 1.50  | 1.08     | 3.00             | 0.200   | NS   |
| Ornamental       | Flowering     | <i>B. glabra</i>                         | 1.40  | 0.84     | 2.80             | 0.258   | NS   |
| Agricultural     | Non-flowering | <i>M. indica</i>                         | 1.30  | 1.34     | 2.60             | 0.332   | NS   |
| Ornamental       | Flowering     | <i>L. camara</i>                         | 1.10  | 0.74     | 2.20             | 0.536   | NS   |
| Native           | Non-flowering | <i>A. macrostachya</i>                   | 1.00  | 1.05     | 2.00             | 0.651   | NS   |
| Positive control | Non-flowering | Sucrose 30% on <i>L. camara</i>          | 1.00  | 0.94     | 2.00             | 0.669   | NS   |

|                  |               |                                 |      |      |      |       |     |
|------------------|---------------|---------------------------------|------|------|------|-------|-----|
| Native           | Non-flowering | <i>R. communis</i>              | 0.90 | 0.99 | 1.80 | 0.332 | NS  |
| Agricultural     | Crushed       | <i>S. officinarum</i>           | 0.80 | 0.63 | 1.60 | 1.000 | NS  |
| Ornamental       | Non-flowering | <i>A. salicina</i>              | 0.70 | 0.67 | 1.40 | 0.812 | NS  |
| Aphids           | Non-flowering | Aphid infested <i>L. camara</i> | 0.60 | 0.70 | 1.20 | 0.622 | NS  |
| Agricultural     | Intact        | <i>S. officinarum</i>           | 0.50 | 0.71 | 1.00 | 0.442 | NS  |
| Negative control | Empty         | Empty trap                      | 0.50 | 0.53 | N/A  | N/A   | N/A |

\* Significant compared to negative control empty trap

NS - Not significant compared to negative controls

NA - Not applicable

381

382 **Table 2B.**

| Origin           | Condition     | Species                                  | Mean  | ±SE  | Attraction Index | P Value | Sig. |
|------------------|---------------|------------------------------------------|-------|------|------------------|---------|------|
| Ornamental       | Flowering     | <i>P. juliflora</i>                      | 12.90 | 5.51 | 32.25            | <0.001  | *    |
| Native           | Flowering     | <i>A. macrostachya</i>                   | 10.20 | 5.37 | 25.50            | <0.001  | *    |
| Ornamental       | Flowering     | <i>A. salicina</i>                       | 7.60  | 4.99 | 19.00            | <0.001  | *    |
| Positive control | Non-flowering | Sucrose 30% on <i>L. camara</i>          | 6.60  | 0.70 | 16.50            | 1.000   | NS   |
| Positive control | Non-flowering | ATSB on <i>L. camara</i>                 | 6.50  | 4.45 | 16.25            | <0.001  | *    |
| Agricultural     | Flowering     | <i>M. indica</i>                         | 3.20  | 1.93 | 8.00             | 0.001   | *    |
| Agricultural     | Fruit         | <i>C. melo</i>                           | 2.90  | 2.47 | 7.25             | 0.002   | *    |
| Agricultural     | Fruit         | <i>M. indica</i>                         | 2.80  | 1.32 | 7.00             | 0.002   | *    |
| Agricultural     | Fruit         | <i>C. papaya</i>                         | 2.70  | 1.77 | 6.75             | 0.003   | *    |
| Native           | Flowering     | <i>R. communis</i>                       | 1.90  | 1.29 | 4.75             | 0.459   | NS   |
| Aphids           | Non-flowering | <i>L. camara</i> with <i>A. gossypii</i> | 1.80  | 1.03 | 4.50             | 0.036   | *    |
| Ornamental       | Non-flowering | <i>P. juliflora</i>                      | 1.30  | 1.06 | 3.25             | 0.154   | NS   |
| Ornamental       | Flowering     | <i>G. gracilis</i>                       | 1.20  | 0.92 | 3.00             | 0.002   | *    |
| Agricultural     | Non-flowering | <i>M. indica</i>                         | 1.10  | 0.99 | 2.75             | 0.274   | NS   |
| Native           | Non-flowering | <i>A. macrostachya</i>                   | 1.00  | 0.94 | 2.50             | 0.342   | NS   |
| Ornamental       | Flowering     | <i>B. glabra</i>                         | 0.90  | 0.74 | 2.25             | 0.478   | NS   |
| Native           | Non-flowering | <i>R. communis</i>                       | 0.60  | 0.70 | 1.50             | 0.459   | NS   |
| Aphids           | Non-flowering | <i>L. camara</i> with <i>A. gossypii</i> | 0.60  | 0.70 | 1.50             | 1.000   | NS   |
| Agricultural     | Intact        | <i>S. officinarum</i>                    | 0.60  | 0.84 | 1.50             | 1.000   | NS   |
| Ornamental       | Flowering     | <i>L. camara</i>                         | 0.60  | 0.70 | 1.50             | 1.000   | NS   |
| Agricultural     | Crushed       | <i>S. officinarum</i>                    | 0.50  | 0.53 | 1.25             | 0.777   | NS   |
| Negative control | Cotton Towel  | Water                                    | 0.50  | 0.53 | 1.25             | 0.777   | NS   |
| Ornamental       | Non-flowering | <i>A. salicina</i>                       | 0.40  | 0.52 | 1.00             | 0.553   | NS   |

|                  |              |             |      |      |      |       |     |
|------------------|--------------|-------------|------|------|------|-------|-----|
| Negative control | Cotton Towel | Sucrose 10% | 0.40 | 0.52 | 1.00 | 0.553 | NS  |
| Negative control | Empty        | Empty trap  | 0.40 | 0.52 | N/A  | N/A   | N/A |

\* Significant compared to negative control empty trap

NS - Not significant compared to negative controls

NA - Not applicable

383

### 384 **Timing of host-seeking and sugar-seeking activities in the field**

385 In shady areas, the three volunteers caught an average 54.5 females and 4.6 males over 18  
386 hours of monitoring. The same volunteers in an open area caught an average of 22.0 females and  
387 0.3 males over 18 hours. In open areas, attraction of females to the volunteers showed a first  
388 peak shortly after sunrise between 07:30 and 08:00 h and a second, larger peak was observed  
389 around sunset between 19:00 and 21:30 h. At shady sites, the first peak was delayed to between  
390 09:30 to 10:30 h and the second appeared earlier, between 18:00 to 19:30 h. The morning peak  
391 of female activity in shaded areas, averaging 15 landings per volunteer, was greater than the  
392 average of 9 landings per volunteer in open areas. In the evening, the average number of female  
393 landings per volunteer was 18 in open areas, while in shade it was nearly 27. Interestingly, in  
394 shaded areas there were also small numbers of male landings, 5 landings per volunteer, roughly  
395 at the same time as the peak of female activity. In open areas, landing of males was negligible  
396 (Fig 5A).

397

### 398 **Fig 5. Periodicity of host-seeking and sugar-seeking behavior of *Ae. aegypti* over 18 hours**

399 (A) evaluated by average catches of mosquitoes landing on a human volunteer, in 30 min  
400 intervals ( $\pm$ SE) and (B) evaluated by catches of GNTs baited with highly attractive flowering  
401 branches of *P. juliflora*. Numbers shown are the average catch per volunteer, per time period and  
402 average catch per trap, per time period ( $\pm$ SE).

403 The attraction rate to a sugar source (traps baited with flowers of *P. juliflora*) in sunny  
404 and shaded areas also exhibited two peaks as did the search for a host (Fig 5B). In open areas,  
405 the first smaller peak of female landings was just after sunrise and the second followed sunset. In  
406 shaded areas, the first peak occurred between 11:30 h and 12:30 h while the second took place  
407 from around 16:30 h to 17:30 h. Sugar questing activity of males in the shady areas followed the  
408 pattern and duration of the females but the numbers caught were about a half. Only 2 males were  
409 caught in open sunny areas throughout the entire study period (Fig 5B).

410

#### 411 **Comparing sugar feeding rates of *Ae. aegypti* in 'sugar rich' and 'sugar poor' habitats**

412 Less than 20% of females and nearly 80% of males landing on human volunteers were  
413 sugar positive in both sugar rich and sugar poor environments. From resting sites within  
414 vegetation, 60-65% of 'sugar rich' site females or males were sugar positive and so were 39-40%  
415 of the females or males sampled from the 'sugar poor' site. Leaving mosquitoes alive in cages  
416 for six hours before testing decreased the proportion of sugar positive specimens by about a half  
417 (Fig 6A and 6B).

418

419 **Fig 6. Percentage of sugar positive mosquitoes from the catch on volunteers and from**  
420 **resting habitat sweep-net catches at sugar rich (SR) and sugar poor (SP) sites. (A) Tested**  
421 **for sugar within 1 hour after collection and (B) 6 hours after collection.**

422

423 **Table 3. The percentage of *Ae. aegypti* with different amounts of sugar in the gut that were**  
424 **caught at 'sugar rich' and 'sugar poor' sites on human volunteers or with sweep-nets in the**  
425 **vegetation. Sugar quantities were classed by the intensity of the anthrone reaction.**

426

| Site       | Time * | Catch type          | Females |       |       |       | Males |       |       |       |
|------------|--------|---------------------|---------|-------|-------|-------|-------|-------|-------|-------|
|            |        |                     | I       | II    | III   | IV    | I     | II    | III   | IV    |
| Sugar rich | 1 hr   | Human landing catch | 60.32   | 32.54 | 6.35  | 0.79  | 23.00 | 40.00 | 29.00 | 8.00  |
| Sugar poor | 1 hr   | Human landing catch | 68.37   | 24.49 | 7.14  | 0.00  | 28.57 | 48.57 | 18.57 | 4.29  |
| Sugar rich | 1 hr   | Resting site catch  | 13.18   | 21.47 | 40.49 | 24.86 | 11.60 | 20.63 | 42.54 | 25.23 |
| Sugar poor | 1 hr   | Resting site catch  | 46.31   | 28.19 | 19.80 | 5.71  | 53.94 | 37.54 | 7.26  | 1.26  |
| Sugar rich | 6 hr   | Human landing catch | 90.39   | 9.62  | 0.00  | 0.00  | 81.81 | 15.91 | 2.27  | 0.00  |
| Sugar poor | 6 hr   | Human landing catch | 92.31   | 7.69  | 0.00  | 0.00  | 56.94 | 30.56 | 12.50 | 0.00  |
| Sugar rich | 6 hr   | Resting site catch  | 47.15   | 36.94 | 12.61 | 3.30  | 56.69 | 29.94 | 11.78 | 1.59  |
| Sugar poor | 6 hr   | Resting site catch  | 80.00   | 16.92 | 3.08  | 0.00  | 75.00 | 23.53 | 1.47  | 0.00  |

\*Time between collection and testing

427

428 Classification of *Ae. aegypti* females or males with different quantities of sugar in the gut  
 429 showed that in ‘sugar rich’ environments, 60 to 90% of the sugar positive females caught on  
 430 volunteers had mostly small (class I) sugar quantities in the gut (Table 3). Samples from ‘sugar  
 431 rich’ resting sites, contained various sugar quantities in similar proportions (classes I to IV). A 6  
 432 hour delay in testing for sugar caused the sugar contents in the gut to degrade, and thus the  
 433 reactions in the sugar testing to fall below classes III and IV. The sugar feeding status of  
 434 mosquitoes caught at the ‘sugar poor’ sites, on volunteers or in resting habitats, followed the  
 435 pattern observed for mosquitoes from the ‘sugar rich’ sites.

436

### 437 **ATSB experiments**

438 The baseline for evaluating the impact of ATSB treatment was the density of female  
 439 mosquitoes landing on volunteers at the control site, and the pre-treatment period at the  
 440 experimental site. The mean daily catches on the 3 volunteers increased gradually at both ‘sugar

441 rich' and 'sugar poor' control sites. At the 'sugar poor' control site, the mean began at 5.46  
 442  $\pm 0.43$  females and was  $32.93 \pm 2.89$  on the last experimental day. At the 'sugar rich' control site,  
 443 the initial mean increased from  $12.27 \pm 1.20$  to  $65.89 \pm 5.55$  females on the last day. ATSB  
 444 treatment at both experimental sites on day 15 caused a drastic reduction in the numbers of *Ae.*  
 445 *aegypti* females from about 5 days post-application until the end of the experiments ( $P < 0.001$   
 446 days 16-50; Table 4). At the treated 'sugar poor' site, the mean of captured females on the last  
 447 day was  $0.29 \pm 0.10$  and at the 'sugar rich' site it was  $3.20 \pm 0.43$  (Fig 7A and 7B, Table 4).  
 448 ATSB significantly reduced mean numbers of landing / biting female *Ae. aegypti* at both 'sugar  
 449 rich' and 'sugar poor' sites. At the sugar poor site, the mean catch pre-treatment on day 14 was  
 450 20.51 females and was reduced 70-fold to 0.29 on day 50. At the sugar rich site, the mean pre-  
 451 treatment catch on day 14 was 32.46 and was reduced 10-fold to 3.20 on day 50 (Fig 7A and 7B,  
 452 Table 4).  
 453  
 454 **Table 4.** Reduction of the *Ae. aegypti* population following ATSB treatment at 'sugar poor' and  
 455 'sugar rich' sites as indicated by the decrease in landings of females on human volunteers  
 456 compared to their frequency at untreated control sites.

| Day | Sugar Poor |      |              |      |        | Sugar Rich |      |              |      |        | SP vs. SR |        |
|-----|------------|------|--------------|------|--------|------------|------|--------------|------|--------|-----------|--------|
|     | Control    |      | Experimental |      |        | Control    |      | Experimental |      |        | Cont      | Exp    |
|     | Mean       | SE   | Mean         | SE   | P      | Mean       | SE   | Mean         | SE   | P      | P         | P      |
| 1   | 5.46       | 0.63 | 9.10         | 0.94 | 0.001  | 12.27      | 1.20 | 19.41        | 1.78 | 0.001  | <0.001    | <0.001 |
| 3   | 8.51       | 0.89 | 8.98         | 0.93 | 0.716  | 13.69      | 1.32 | 17.53        | 1.63 | 0.065  | 0.001     | <0.001 |
| 6   | 6.66       | 0.73 | 10.17        | 1.03 | 0.005  | 19.68      | 1.80 | 20.39        | 1.86 | 0.785  | <0.001    | <0.001 |
| 9   | 7.99       | 0.84 | 12.96        | 1.26 | 0.001  | 16.00      | 1.50 | 22.94        | 2.07 | 0.006  | <0.001    | <0.001 |
| 12  | 14.05      | 1.35 | 16.67        | 1.56 | 0.203  | 25.70      | 2.29 | 23.62        | 2.12 | 0.505  | <0.001    | 0.007  |
| 14  | 16.46      | 1.55 | 20.51        | 1.88 | 0.096  | 22.67      | 2.05 | 32.46        | 2.84 | 0.004  | 0.014     | 0.000  |
| 16  | 19.19      | 1.77 | 8.58         | 0.90 | <0.001 | 24.59      | 2.21 | 22.77        | 2.06 | 0.548  | 0.054     | <0.001 |
| 19  | 21.04      | 1.93 | 4.81         | 0.58 | <0.001 | 28.21      | 2.50 | 17.46        | 1.62 | 0.000  | 0.022     | <0.001 |
| 22  | 17.06      | 1.59 | 2.49         | 0.36 | <0.001 | 25.17      | 2.25 | 10.31        | 1.04 | <0.001 | 0.003     | <0.001 |

|    |       |      |      |      |        |       |      |      |      |        |        |        |
|----|-------|------|------|------|--------|-------|------|------|------|--------|--------|--------|
| 25 | 23.28 | 2.10 | 1.56 | 0.27 | <0.001 | 30.99 | 2.73 | 7.60 | 0.81 | <0.001 | 0.024  | <0.001 |
| 28 | 18.76 | 1.73 | 0.70 | 0.17 | <0.001 | 38.10 | 3.31 | 3.95 | 0.50 | <0.001 | <0.001 | <0.001 |
| 31 | 23.57 | 2.12 | 0.47 | 0.14 | <0.001 | 44.29 | 3.82 | 6.62 | 0.73 | <0.001 | <0.001 | <0.001 |
| 35 | 26.04 | 2.32 | 0.22 | 0.09 | <0.001 | 40.65 | 3.53 | 2.44 | 0.36 | <0.001 | 0.000  | <0.001 |
| 38 | 24.34 | 2.19 | 0.41 | 0.13 | <0.001 | 48.95 | 4.18 | 1.14 | 0.22 | <0.001 | <0.001 | 0.005  |
| 41 | 28.89 | 2.55 | 0.26 | 0.10 | <0.001 | 55.37 | 4.69 | 0.92 | 0.20 | <0.001 | <0.001 | 0.004  |
| 44 | 24.23 | 2.18 | 0.63 | 0.16 | <0.001 | 62.17 | 5.24 | 1.00 | 0.21 | <0.001 | <0.001 | 0.156  |
| 47 | 30.14 | 2.66 | 0.47 | 0.14 | <0.001 | 56.52 | 4.78 | 0.59 | 0.16 | <0.001 | <0.001 | 0.561  |
| 50 | 32.93 | 2.89 | 0.29 | 0.10 | <0.001 | 65.89 | 5.55 | 3.20 | 0.43 | <0.001 | <0.001 | <0.001 |

457

458

459 **Fig 7. Reduction of *Ae. aegypti* female population following ATSB treatment.** Results are  
 460 shown as the reduction in mean number of landing/biting attempts per 30-minute interval for the  
 461 treatment and control sites. (A) Sugar rich sites. (B) Sugar poor sites.

462

## 463 Discussion

464 In this study, we investigated the feeding of *Ae. aegypti* in the laboratory and in the field  
 465 on some natural sugar sources. We compared sugar feeding of the mosquitoes in urban ‘sugar  
 466 poor’ and ‘sugar rich’ habitats, and then tested the potential of mosquito control by ATSB in the  
 467 two different types of environments.

468 The 24 hour exposure to single, potential sugar sources demonstrated that the proportion  
 469 of sugar positive *Ae. aegypti* was high in those offered flowers or fruit: 93.00% of females and  
 470 92.78% of males fed on *Acacia macrostachia*, 84.44% of females and 97.22% of males fed on *C.*  
 471 *papaya*, 93.89% of females and 83.89% of males fed on *C. melo*, 81.67% of females and 84.44%  
 472 of males fed on on *M. indica*, and 92.78% of females and 93.33% of males fed on *P. juliflora*. It  
 473 is interesting to note that feeding rates for females (and for males) on some flowers was low:  
 474 15.56% of females fed on *B. glabra* and 1.67% of females fed on *N. glauca*. Seedpods (*P.*



475 *reticulatum*) and sugarcane (*S. officinarum*) have tough outer coverings and therefore their sugar  
476 is apparently inaccessible to *Ae. aegypti* (Table 1). It is not surprising that mosquitoes died in  
477 less than a week on the sole diet of fairly inedible *B. glabra* while ~ 90% survived in a series  
478 maintained on the highly attractive nectar of *P. juliflora*. A high rate of feeding does not  
479 necessarily mean high quality of meals. In the survival experiment, there was no link between  
480 the 85.00% of females feeding on *G. gracilis* flowers within 24 hrs (Table 1) and the high (~  
481 50%) mortality in mosquitoes exposed to these flowers for 30 days (Fig 4A and 4B). In this  
482 context, it should be noted that the mosquitoes in the above experiments may have fed on a given  
483 source of sugar because there was no alternative. It should also be noted that in the tight space of  
484 50 X 50 cm cages, contact between the flying mosquitoes and the offered diet is presumably  
485 inevitable, hence feeding is not necessarily the outcome of attraction.

486         The preference of sugar sources in nature is exhibited in the size of catches by baited  
487 traps which show the relative attraction compared to other tested baits and in competition with  
488 other environmental olfactory cues. An example of the difference between direct contact with a  
489 sugar source in cages and the performance of a sugar source as an attractant is *L. camara*.  
490 Overnight exposure to it in a cage resulted in 60.0 to 63.3% feeding (Table 1) but used as a bait  
491 in the field, the low catch amounted to a mean of 1.3% to 3.6% females per trap (Table 2A).  
492 Such differences in attraction in laboratory versus field settings were noted and discussed in  
493 early studies [15,38,39]. Some of these attractive baits were also highly attractive to *An. gambiae*  
494 s.l., *An. sergentii*, *Ae. albopictus* and *Culex pipiens* [27,28,30,39] showing that mosquitoes of  
495 different genera and of both sexes are commonly attracted to specific emanations mostly to  
496 flowers of some plants. It would be interesting to see whether it is a developed adaptation that  
497 guides different mosquitoes to the richest sources of sugar in their environment.

498           The observation of peak times for searching for sugar meals, which are at dawn and dusk  
499 (Fig 5A and 5B), are useful for obtaining maximal information on the sugar-feeding status of *Ae.*  
500 *aegypti* populations. This is particularly important in view of the rapid digestion of sugar meals  
501 which may be misleading when mosquitoes are caught at the wrong time of the day or kept alive  
502 before being tested for sugar. For example, in catches on volunteers in sugar rich area only  
503 60.32% blood fed mosquitoes had stage 1 (minimal quantities) sugar quantities in the gut.  
504 Examination of a similar series of mosquitoes caught in sugar rich areas, after 6 hrs delay, the  
505 proportion of stage 1 blood meals increased to 90.39%. In previous studies that estimated the  
506 digestion rates of mosquito species in the field, the half-life of fructose was approximately 7 to  
507 10 hours [15,40,41].

508           To a certain degree, sugar meals inhibit the taking of blood and vice versa, both  
509 competing for space in the gut system [42, 43] and as a result, host seeking behaviour is  
510 terminated [44]. In Israel [34], it was shown that *Ae. albopictus* females that have fed on natural  
511 sugar sources or ATSB did not come to humans to blood feed. An opposite extreme case is *Ae.*  
512 *aegypti* that are adapted to domestic environments where sugar may be rare but there is an easy  
513 and unlimited access to blood [45]. This mosquito uses supplementary blood meals during the  
514 gonotrophic cycle as energy reserves [19] that convert blood into survival time in a ratio reported  
515 to be higher than that of nondomestic species [17]. In the domestic environment, females of this  
516 species seldom feed on sugar, but feral populations often do [45, 46]. In the laboratory, all sugar  
517 feeding ceases when blood-host stimuli are present, but without such stimuli, sugar feeding is  
518 frequent [47]. Thus, the option to take sugar is retained for the competitive advantage it affords  
519 under some circumstances. A similar strategy may be used by some anthropophilic *Anopheles*

520 spp. [48]. Whether *Ae. aegypti* commonly, rarely, or never take sugar in nature remains  
521 controversial [48-51].

522         Theoretically, such variations can be interpreted as results of metabolic differences  
523 between mosquito subpopulations. Otherwise, assuming that producing energy from blood meals  
524 is general in *Ae. aegypti*, differences in the rates of blood and sugar feeding could be a response  
525 dictated by the environment that is, according to the relative abundance of sources.

526

527 It was also concluded that the enhanced blood-feeding capability among older sugar-deprived  
528 *An. gambiae* demonstrated the close association between sugar-feeding and blood-feeding  
529 behavior [52]. Our results similarly portray dependence of the blood feeding drive on sugar  
530 feeding. In catches on volunteers, the proportion of sugar positive females was similar in sugar  
531 poor (68.37% class I, Table 3) and in sugar rich areas (60.32% class I, Table 3). On the other  
532 hand, in sugar rich resting habitats, the quantity of class I sugar meals was 13.18% and 65.35%  
533 were of classes III and IV. Moreover, their proportion was about 40% greater than in the sugar  
534 poor resting habitats where 46.31% were of class I and 25.51% were of classes III and IV. These  
535 results indicate that following feeding on larger sugar quantities in the relatively lush vegetation  
536 of urban sugar rich habitats, mosquitoes were less interested in blood meals. Also, in the sugar  
537 poor and sugar rich areas, the effect of ATSB treatments were manifested at similarly rapid rates  
538 and the reduction of the mosquito population was to similar levels. In other words, mosquitoes  
539 responded equally when the sugar bait (ATSB) was uniformly offered in both habitats. In both  
540 experiments, the catch on volunteers and the results of ATSB treatment, it appears that the  
541 intensity of the search for a host blood meal depends on the prevalence or scarcity of sugar meals  
542 in different types of *Ae. aegypti* urban habitats.

543 Attractive Toxic Sugar Bait (ATSB) treatment applied in the sugar poor and sugar rich  
544 areas caused a drastic reduction in *Ae. aegypti* approaches to volunteers in both environments.  
545 The initial effect of ATSB was apparently somewhat delayed since there was a massive supply  
546 of newly emerged mosquitoes. Later, high female mortality reduced the oviposition and the *Ae.*  
547 *aegypti* populations collapsed almost completely. At the sugar rich sites, the daily approaches of  
548 *Ae. aegypti* to the volunteers decreased from an average of 28.0 before treatment to 1.7 landings /  
549 bites a week later (Fig 7A). At the sugar poor sites, an average of 19.0 landings was reduced to  
550 0.44 in the first week and these levels remained similarly low until the end of the experiment  
551 (Fig 7B). The drastic effect of ATSB is comparable to the results obtained in Israel, Florida,  
552 Morocco and Mali [28, 30, 33, 53-55].

553 Since sugar is the only food source for male mosquitoes [15], ATSB should be highly  
554 effective against male *Ae. aegypti* but should also affect survival and fecundity of females as  
555 well. Our data demonstrates that ATSB treatment can be highly effective against *Ae. aegypti* in  
556 both sugar rich and sugar poor environments. ATSB was also highly effective against *Ae.*  
557 *albopictus* in Mali [34] and it may be a significant treatment against both species, particularly if  
558 their distribution overlaps. Generally, it appears from this study that ATSB is a new promising  
559 tool for the control of *Ae. aegypti*.

560

## 561 **Acknowledgements**

562 We dedicate this work to Fatoumata Sissoko who passed away suddenly after the completion of  
563 this work. We also wish to thank the participating communities of Bamako in Mali. This work,  
564 titled "ICEMR-Mali: Multidisciplinary research for malaria control and prevention in West

565 Africa”, was supported by NIH NIAID grant number U19 AI129387 awarded to JB. The funders  
566 had no role in study design, data collection and analysis, decision to publish, or preparation of  
567 the manuscript. The authors declare that no competing interests exist in relation to this project.

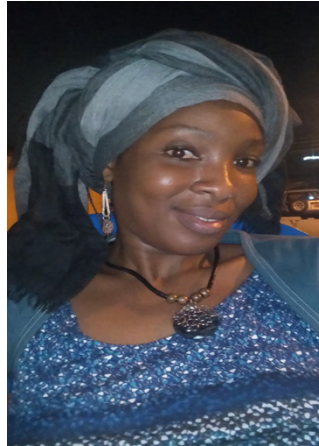

568

569

## 570 **References**

- 571 1. Gubler DJ. Epidemic dengue/dengue hemorrhagic fever as a public health, social and  
572 economic problem in the 21st century. *Trends in Microbiology*. 2002;10(2):100-3.  
573
- 574 2. Barrett AD, Higgs S. Yellow fever: a disease that has yet to be conquered. *Annual Review of*  
575 *Entomology* 2007;52:209-29.  
576
- 577 3. Caglioti C, Lalle E, Castilletti C, Carletti F, Capobianchi MR, Bordi L. Chikungunya virus  
578 infection: an overview. *New Microbiology* 2013;36(3):211-7.  
579
- 580 4. Chouin-Carneiro T, Vega-Rua A, Vazeille M, Yebakima A, Girod R, Goindin D, Dupont-  
581 Rouzeyrol M, Lourenço-de-Oliveira R, Failloux AB. Differential susceptibilities of *Aedes*  
582 *aegypti* and *Aedes albopictus* from the Americas to Zika virus. *PLoS Neglected Tropical*  
583 *Diseases*. 2016;10(3):e0004543.  
584
- 585 5. WHO. Yellow fever in 1998. *Weekly Epidemiological Records*. 1990;65:213-219.  
586
- 587 6. Garske T, Van Kerkhove MD, Yactayo S, Ronveaux O, Lewis RF, Staples JE, Perea W,  
588 Ferguson NM, Yellow Fever Expert Committee. Yellow Fever in Africa: estimating the burden  
589 of disease and impact of mass vaccination from outbreak and serological data. *PLoS Medicine*.  
590 2014; 11(5):e1001638.  
591
- 592 7. WHO. Dengue hemorrhagic fever, diagnosis, treatment and control. WHO Geneva. 1986;7-15.  
593

- 594 8. Chadee DD. Resting behaviour of *Aedes aegypti* in Trinidad: with evidence for the re-  
595 introduction of indoor residual spraying (IRS) for dengue control. *Parasites and Vectors*.  
596 2013;6(1):255.  
597
- 598 9. Rapley LP, Johnson PH, Williams CR, Silcock RM, Larkman M, Long SA, Russell RC,  
599 Ritchie SA. A lethal ovitrap-based mass trapping scheme for dengue control in Australia: II.  
600 Impact on populations of the mosquito *Aedes aegypti*. *Medical and Veterinary Entomology*.  
601 2009;23(4):303-16.  
602
- 603 10. Tsuzuki A, Huynh T, Tsunoda T, Luu L, Kawada H, Takagi M. Effect of existing practices  
604 on reducing *Aedes aegypti* pre-adults in key breeding containers in Ho Chi Minh City, Vietnam.  
605 *The American Journal of Tropical Medicine and Hygiene*. 2009;80(5):752-7.  
606
- 607 11. Benelli G, Mehlhorn H. Declining malaria, rising of dengue and Zika virus: insights for  
608 mosquito vector control. *Parasitology Research*. 2016;115(5):1747-54.  
609
- 610 12. Von Seidlein L, Kekulé AS, Strickman D. Novel vector control approaches: The future for  
611 prevention of Zika virus transmission. *PLoS Medicine*. 2017; 17;14(1):e1002219.  
612
- 613 13. WHO. Draft global vector control response 2017-2030 (Version 4.3)  
614 [www.who.int/malaria/areas/vector\\_control/Draft-WHO-GVCR-2017-2030.pdf](http://www.who.int/malaria/areas/vector_control/Draft-WHO-GVCR-2017-2030.pdf)  
615 2016. Last accessed Oct. 10, 2017.  
616
- 617 14. WHO. Mosquito (vector) control emergency response and preparedness for Zika virus  
618 <http://www.who.int/neglecteddiseases/news/mosquitovectorcontrolresponse/en/> 2017  
619 6;11(5):e1001638.  
620
- 621 15. Foster WA. Mosquito sugar feeding and reproductive energetics. *Annual Review of*  
622 *Entomology*. 1995;40(1):443-74.  
623
- 624 16. Yuval B. The other habit- sugar feeding by mosquitoes. *Bulletin of the Society for Vector*  
625 *Ecology*. 1992; 17:150-156.  
626
- 627 17. Nayar JK, Sauerman DM. The effects of nutrition on survival and fecundity in Florida  
628 mosquitoes: Part 2. Utilization of a blood meal for survival. *Journal of Medical Entomology*.  
629 1975;12(1):99-103.  
630
- 631 18. Edman JD, Strickman D, Kittayapong P, Scott TW. Female *Aedes aegypti* (Diptera:  
632 Culicidae) in Thailand rarely feed on sugar. *Journal of Medical Entomology*. 1992;29(6):1035-8.  
633
- 634 19. Scott TW, Clark GG, Lorenz LH, Amerasinghe PH, Reiter P, Edman JD. Detection of  
635 multiple blood feeding in *Aedes aegypti* (Diptera: Culicidae) during a single gonotrophic cycle  
636 using a histologic technique. *Journal of Medical Entomology*. 1993;30(1):94-9.  
637

- 638 20. Scott JM, Seeger KE, Gibson-Corrado J, Muller GC, Xue RD. Attractive Toxic Sugar Bait  
639 (ATSB) mixed with pyriproxyfen for control of larval *Aedes albopictus* (Diptera: Culicidae)  
640 through fecal deposits of adult mosquitoes. *Journal of Medical Entomology*. 2017;54(1):236-8.  
641
- 642 21. France KR, Judson CL. Nitrogen partitioning and blood meal utilization by *Aedes aegypti*  
643 (Diptera Culicidae). *Journal of Insect Physiology*. 1979;25(11):841-6.  
644
- 645 22. Briegel H. Protein catabolism and nitrogen partitioning during oögenesis in the mosquito  
646 *Aedes aegypti*. *Journal of insect physiology*. 1986;32(5):455-62.  
647
- 648 23. Martinez-Ibarra JA, Rodriguez MH, Arredondo-Jimenez JI, Yuval B. Influence of plant  
649 abundance on nectar feeding by *Aedes aegypti* (Diptera: Culicidae) in southern Mexico. *Journal*  
650 *of medical entomology*. 1997;34(6):589-93.  
651
- 652 24. Chadee DD, Sutherland JM, Gilles JR. Diel sugar feeding and reproductive behaviours of  
653 *Aedes aegypti* mosquitoes in Trinidad: With implications for mass release of sterile mosquitoes.  
654 *Acta Tropica*. 2014;132:S86-90.  
655
- 656 25. Qualls WA, Naranjo DP, Subía MA, Ramon G, Cevallos V, Grijalva I, Gómez E, Arheart  
657 KL, Fuller DO, Beier JC. Movement of *Aedes aegypti* following a sugar meal and its implication  
658 in the development of control strategies in Durán, Ecuador. *Journal of Vector Ecology*.  
659 2016;41(2):224-31.  
660
- 661 26. Gu W, Müller G, Schlein Y, Novak RJ, Beier JC. Natural plant sugar sources of *Anopheles*  
662 mosquitoes strongly impact malaria transmission potential. *PLoS One*. 2011 Jan 20;6(1):e15996.  
663
- 664 27. Müller G, Schlein Y. Sugar questing mosquitoes in arid areas gather on scarce blossoms that  
665 can be used for control. *International Journal for Parasitology*. 2006;36(10):1077-80.  
666
- 667 28. Müller GC, Schlein Y. Efficacy of toxic sugar baits against adult cistern-dwelling *Anopheles*  
668 *claviger*. *Transactions of The Royal Society of Tropical Medicine and Hygiene*.  
669 2008;102(5):480-4.  
670
- 671 29. Müller GC, Junnila A, Schlein Y. Effective control of adult *Culex pipiens* by spraying an  
672 attractive toxic sugar bait solution in the vegetation near larval habitats. *Journal of Medical*  
673 *Entomology*. 2010a;47(1):63-6.  
674
- 675 30. Müller GC, Beier JC, Traore SF, Toure MB, Traore MM, Bah S, Doumbia S, Schlein Y.  
676 Field experiments of *Anopheles gambiae* attraction to local fruits/seedpods and flowering plants  
677 in Mali to optimize strategies for malaria vector control in Africa using attractive toxic sugar bait  
678 methods. *Malaria Journal*. 2010b;9(1):262.  
679
- 680 31. Müller GC, Beier JC, Traore SF, Toure MB, Traore MM, Bah S, Doumbia S, Schlein Y.  
681 Successful field trial of attractive toxic sugar bait (ATSB) plant-spraying methods against  
682 malaria vectors in the *Anopheles gambiae* complex in Mali, West Africa. *Malaria Journal*.  
683 2010c;9(1):210.

- 684  
685 32. Beier JC, Müller GC, Gu W, Arheart KL, Schlein Y. Attractive toxic sugar bait (ATSB)  
686 methods decimate populations of *Anopheles* malaria vectors in arid environments regardless of  
687 the local availability of favoured sugar-source blossoms. *Malaria journal*. 2012;11(1):31.  
688
- 689 33. Revay EE, Müller GC, Qualls WA, Kline DL, Naranjo DP, Arheart KL, Kravchenko VD,  
690 Yefremova Z, Hausmann A, Beier JC, Schlein Y. Control of *Aedes albopictus* with Attractive  
691 Toxic Sugar Baits (ATSB) and potential impact on non-target organisms in St. Augustine,  
692 Florida. *Parasitology Research*. 2014;113(1):73-9.  
693
- 694 34. Junnila A, Revay EE, Müller GC, Kravchenko V, Qualls WA, Allen SA, Beier JC, Schlein  
695 Y. Efficacy of attractive toxic sugar baits (ATSB) against *Aedes albopictus* with garlic oil  
696 encapsulated in beta-cyclodextrin as the active ingredient. *Acta Tropica*. 2015;152:195-200.  
697
- 698 35. Schlein Y, Jacobson RL. Mortality of *Leishmania major* in *Phlebotomus papatasi* caused by  
699 plant feeding of the sand flies. *American Journal of Tropical Medicine and Hygiene*.  
700 1994;50(1):20-7.  
701
- 702 36. United States Environmental Protection Agency (EPA). Product performance test guidelines  
703 OPPTS 810.3700: Insect repellents to be applied to human skin. 2010 July EPA 712-C-10-00.  
704
- 705 37. Qualls WA, Müller GC, Revay EE, Allan SA, Arheart KL, Beier JC, Smith ML, Scott JM,  
706 Kravchenko VD, Hausmann A, Yefremova ZA. Evaluation of attractive toxic sugar bait  
707 (ATSB)—barrier for control of vector and nuisance mosquitoes and its effect on non-target  
708 organisms in sub-tropical environments in Florida. *Acta Tropica*. 2014;131:104-10.  
709
- 710 38. Healy TP, Jepson PC. The location of floral nectar sources by mosquitoes: the long-range  
711 responses of *Anopheles arabiensis* Patton (Diptera: Culicidae) to *Achillea millefolium* flowers  
712 and isolated floral odour. *Bulletin of Entomological Research*. 1988;78(4):651-7.  
713
- 714 39. Muller, GC, Junnila, A, Traore, MM, Traore, SF, Doumbia, S, Sissoko, F, Dembele, SM,  
715 Schlein, Y, Arheart, KL, Revay, EE and Kravchenko, VD. The invasive shrub *Prosopis juliflora*  
716 enhances the malaria parasite transmission capacity of *Anopheles* mosquitoes: a habitat  
717 manipulation experiment. *Malaria Journal*. 2017;16(1):237.  
718
- 719 40. Reisen WK, Meyer RP, Milby MM. Patterns of fructose feeding by *Culex tarsalis* (Diptera:  
720 Culicidae). *Journal of Medical Entomology*. 1986;23(4):366-73.  
721
- 722 41. Andersson IH, Jaenson TG. Nectar feeding by mosquitoes in Sweden, with special reference  
723 to *Culex pipiens* and *Cx torrentium*. *Medical and Veterinary Entomology*. 1987;1(1):59-64.  
724
- 725 42. Vargo AM, Foster WA. Responsiveness of female *Aedes aegypti* (Diptera: Culicidae) to  
726 flower extracts. *Journal of Medical Entomology*. 1982;19(6):710-8.  
727



- 728 43. Hancock RG, Foster WA. Effects of preblood-meal sugar on sugar seeking and upwind flight  
729 by gravid and parous *Aedes aegypti* (Diptera: Culicidae). *Journal of Medical Entomology*.  
730 1993;30(2):353-9.  
731
- 732 44. Klowden MJ, Lea AO. Abdominal distension terminates subsequent host-seeking behaviour  
733 of *Aedes aegypti* following a blood meal. *Journal of Insect Physiology*. 1979;25(7):583-5.  
734
- 735 45. Nayar JK. *Aedes aegypti* (L.)(Diptera: Culicidae): Observations on dispersal, survival,  
736 insemination, ovarian development and oviposition characteristics of a Florida population.  
737 *Journal of the Florida Anti-Mosquito Association*. 1981;52:24-40.  
738
- 739 46. Van Handel E, Edman JD, Day JF, Scott TW, Clark GG, Reiter P, Lynn HC. Plant-sugar,  
740 glycogen, and lipid assay of *Aedes aegypti* collected in urban Puerto Rico and rural Florida.  
741 *Journal of the American Mosquito Control Association*. 1994;10(2):149-53.  
742
- 743 47. Yee WL, Foster WA. Diel sugar-feeding and host-seeking rhythms in mosquitoes (Diptera:  
744 Culicidae) under laboratory conditions. *Journal of Medical Entomology*. 1992 Sep 1;29(5):784-  
745 91.  
746
- 747 48. Briegel H. Metabolic relationship between female body size, reserves, and fecundity of  
748 *Aedes aegypti*. *Journal of Insect Physiology*. 1990a;36(3):165-72.  
749
- 750 49. Holstein M. *Biology of Anopheles gambiae: Research in Western Africa*. Geneva: WHO.  
751 1954.  
752
- 753 50. Laarman JJ. The intake of sugars by females of wild *Anopheles gambiae* and *Anopheles*  
754 *funestas*. *Acta Leidensia*. 1968;36.  
755
- 756 51. Muirhead-Thomson RC. *Mosquito behaviour in relation to malaria transmission and control*  
757 *in the Tropics*. London: Edward Arnold and Co.; 1951.  
758
- 759 52. Straif SC, Beier JC. Effects of sugar availability on the blood-feeding behavior of *Anopheles*  
760 *gambiae* (Diptera: Culicidae). *Journal of Medical Entomology*. 1996;33(4):608-12.  
761
- 762 53. Müller GC, Xue RD, Schlein Y. Seed pods of the carob tree *Ceratonia siliqua* are a favored  
763 sugar source for the mosquito *Aedes albopictus* in coastal Israel. *Acta Tropica*.  
764 2010d;116(3):235-9.  
765
- 766 54. Müller GC, Xue RD, Schlein Y. Differential attraction of *Aedes albopictus* in the field to  
767 flowers, fruits and honeydew. *Acta Tropica*. 2011;118(1):45-9.  
768
- 769 55. Khallaayoune K, Qualls WA, Revay EE, Allan SA, Arheart KL, Kravchenko VD, Xue RD,  
770 Schlein Y, Beier JC, Müller GC. Attractive toxic sugar baits: control of mosquitoes with the low-  
771 risk active ingredient dinotefuran and potential impacts on nontarget organisms in Morocco.  
772 *Environmental Entomology*. 2013;42(5):1040-5.

**Fig 1. Microtitre plate with anthrone tested samples.** Class I through IV colour intensities as well as negative control wells are shown.

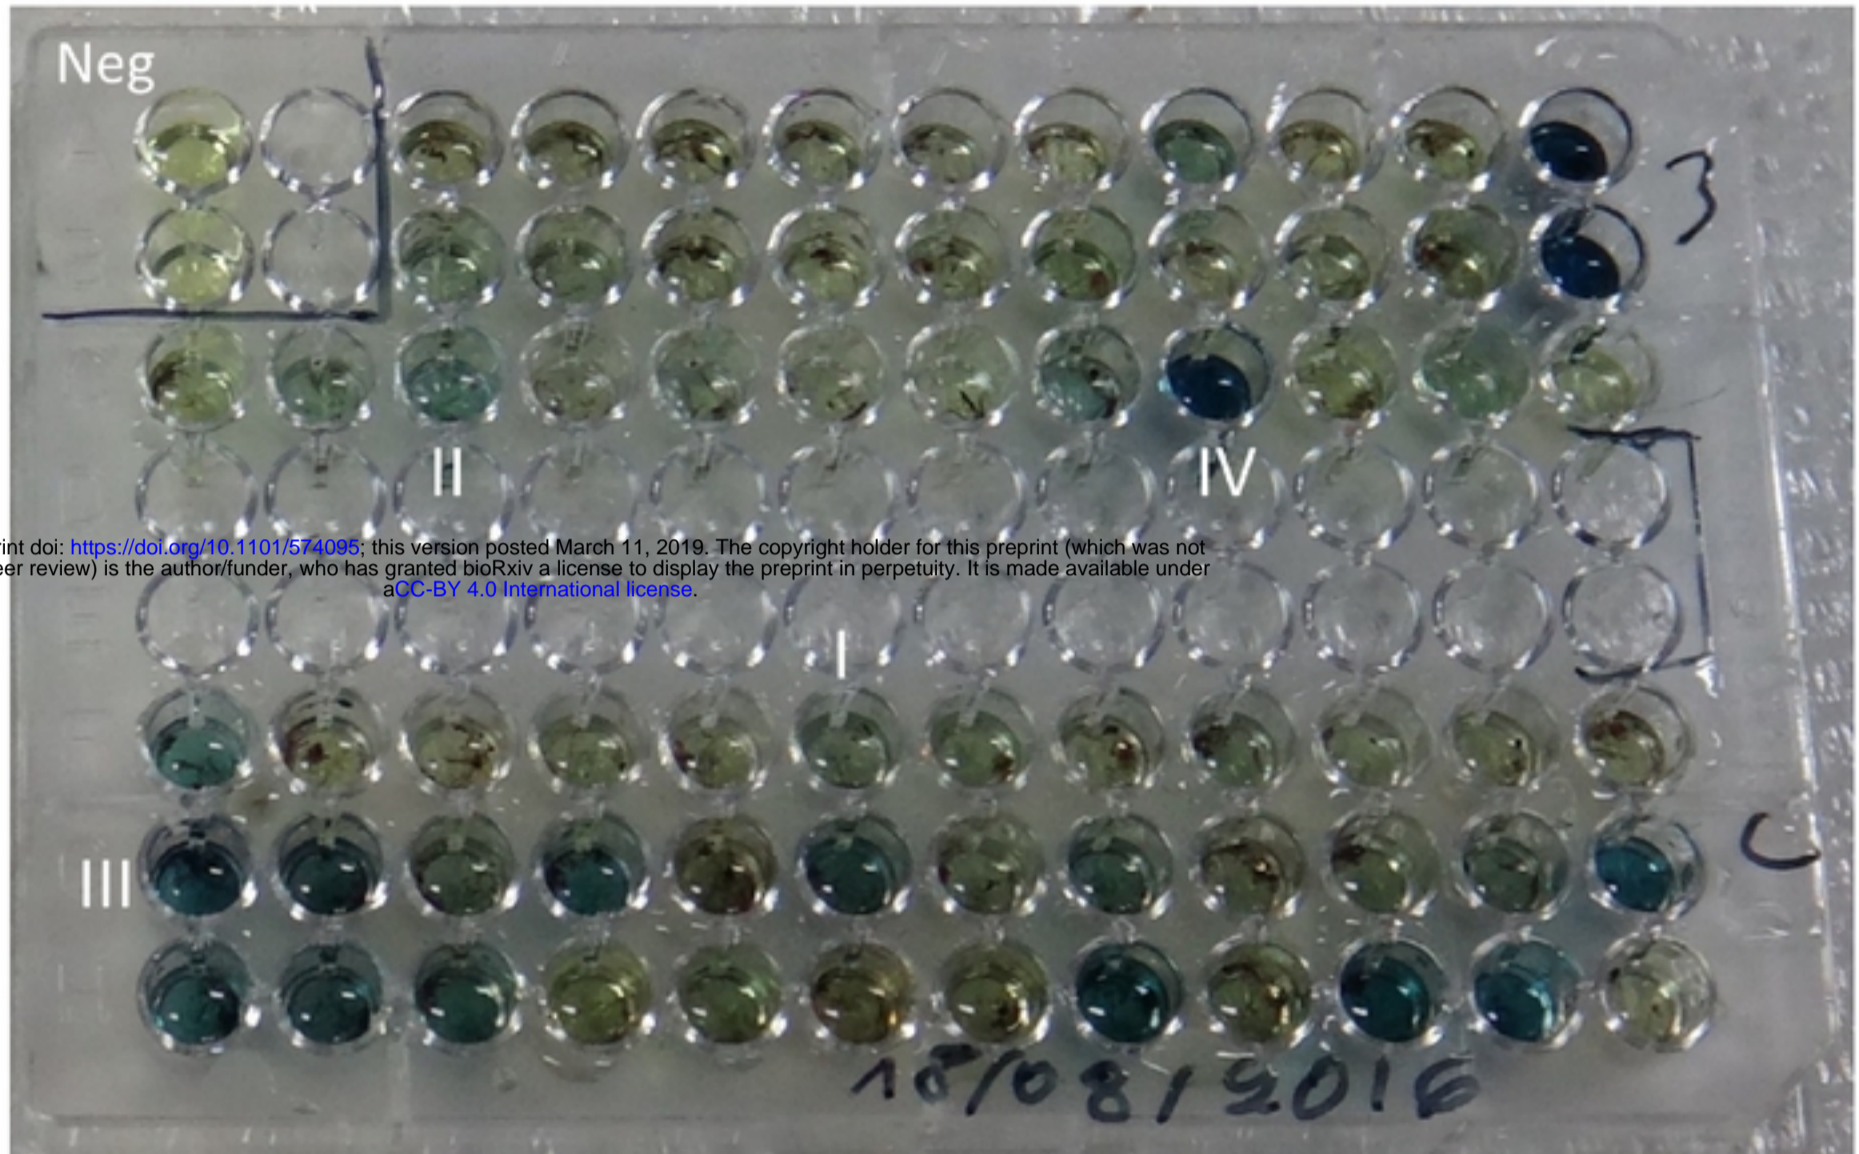

**Fig 2. Pictures of sugar rich and sugar poor habitats. A and B) Densely populated urban areas with sparse vegetation (<5% flowering), C and D) Lush vegetation of irrigated gardens and parkland with areas of  $\geq 50\%$  flowering vegetation.**

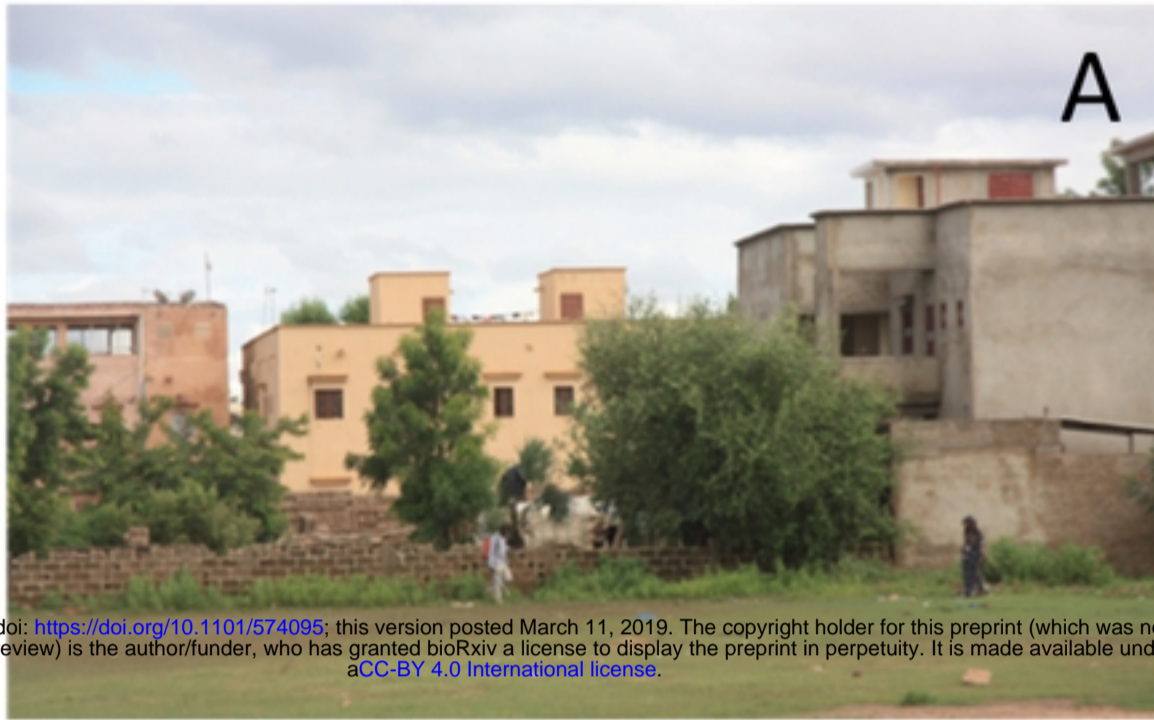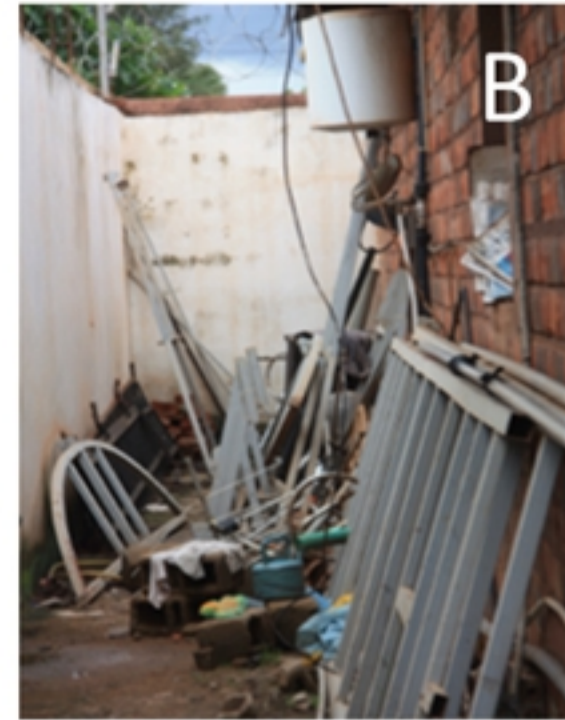

bioRxiv preprint doi: <https://doi.org/10.1101/574095>; this version posted March 11, 2019. The copyright holder for this preprint (which was not certified by peer review) is the author/funder, who has granted bioRxiv a license to display the preprint in perpetuity. It is made available under aCC-BY 4.0 International license.

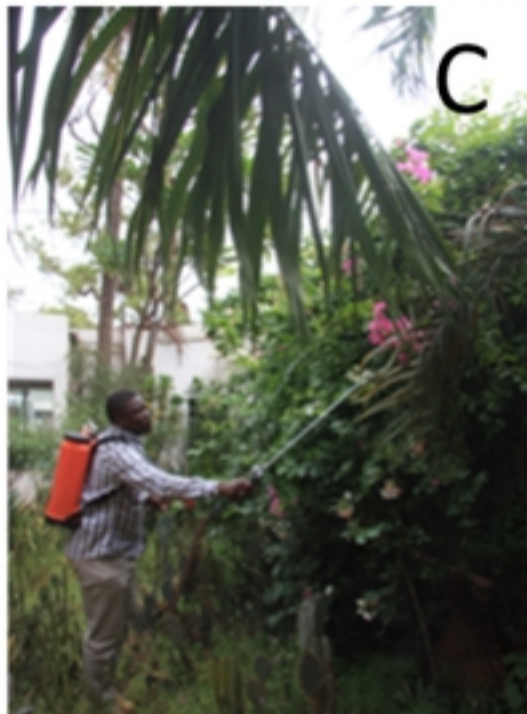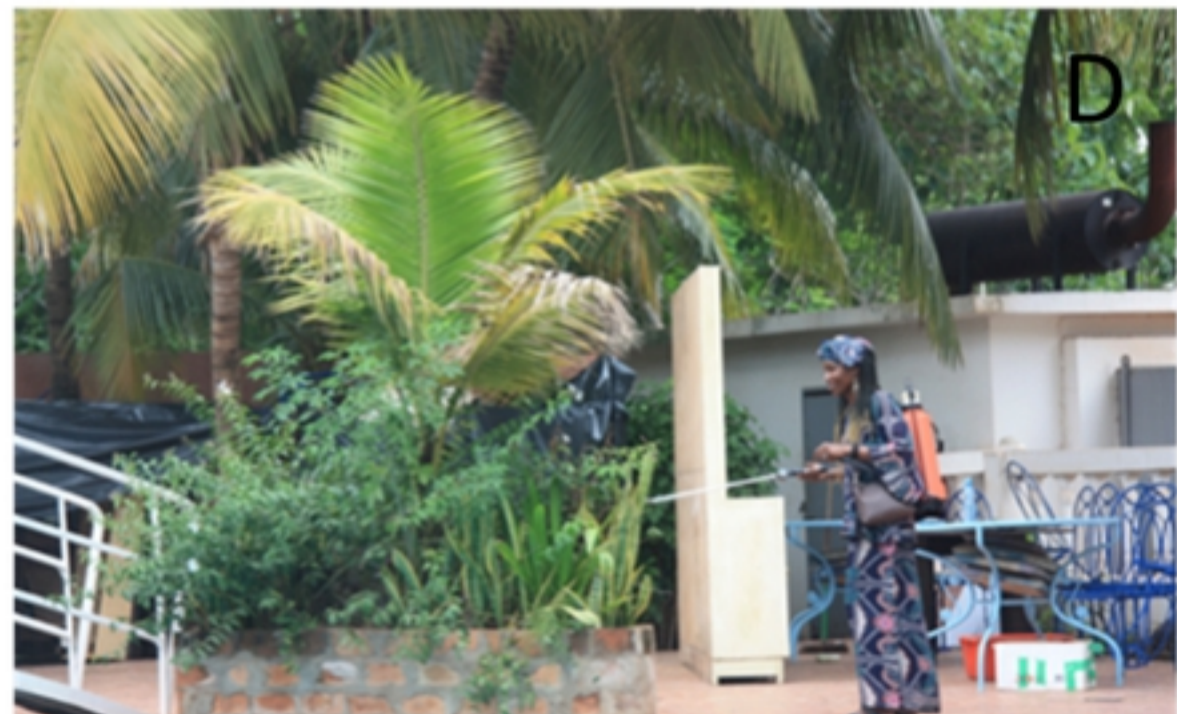

**Fig 5A. Periodicity of host-seeking and sugar-seeking behavior of *Ae. aegypti* over 18 hours**

(A) evaluated by average catches of mosquitoes landing on a human volunteer, in 30 min intervals ( $\pm$ SE) and (B) evaluated by catches of GNTs baited with highly attractive flowering branches of *P. juliflora*. Numbers shown are the average catch per volunteer, per time period and average catch per trap, per time period ( $\pm$ SE).

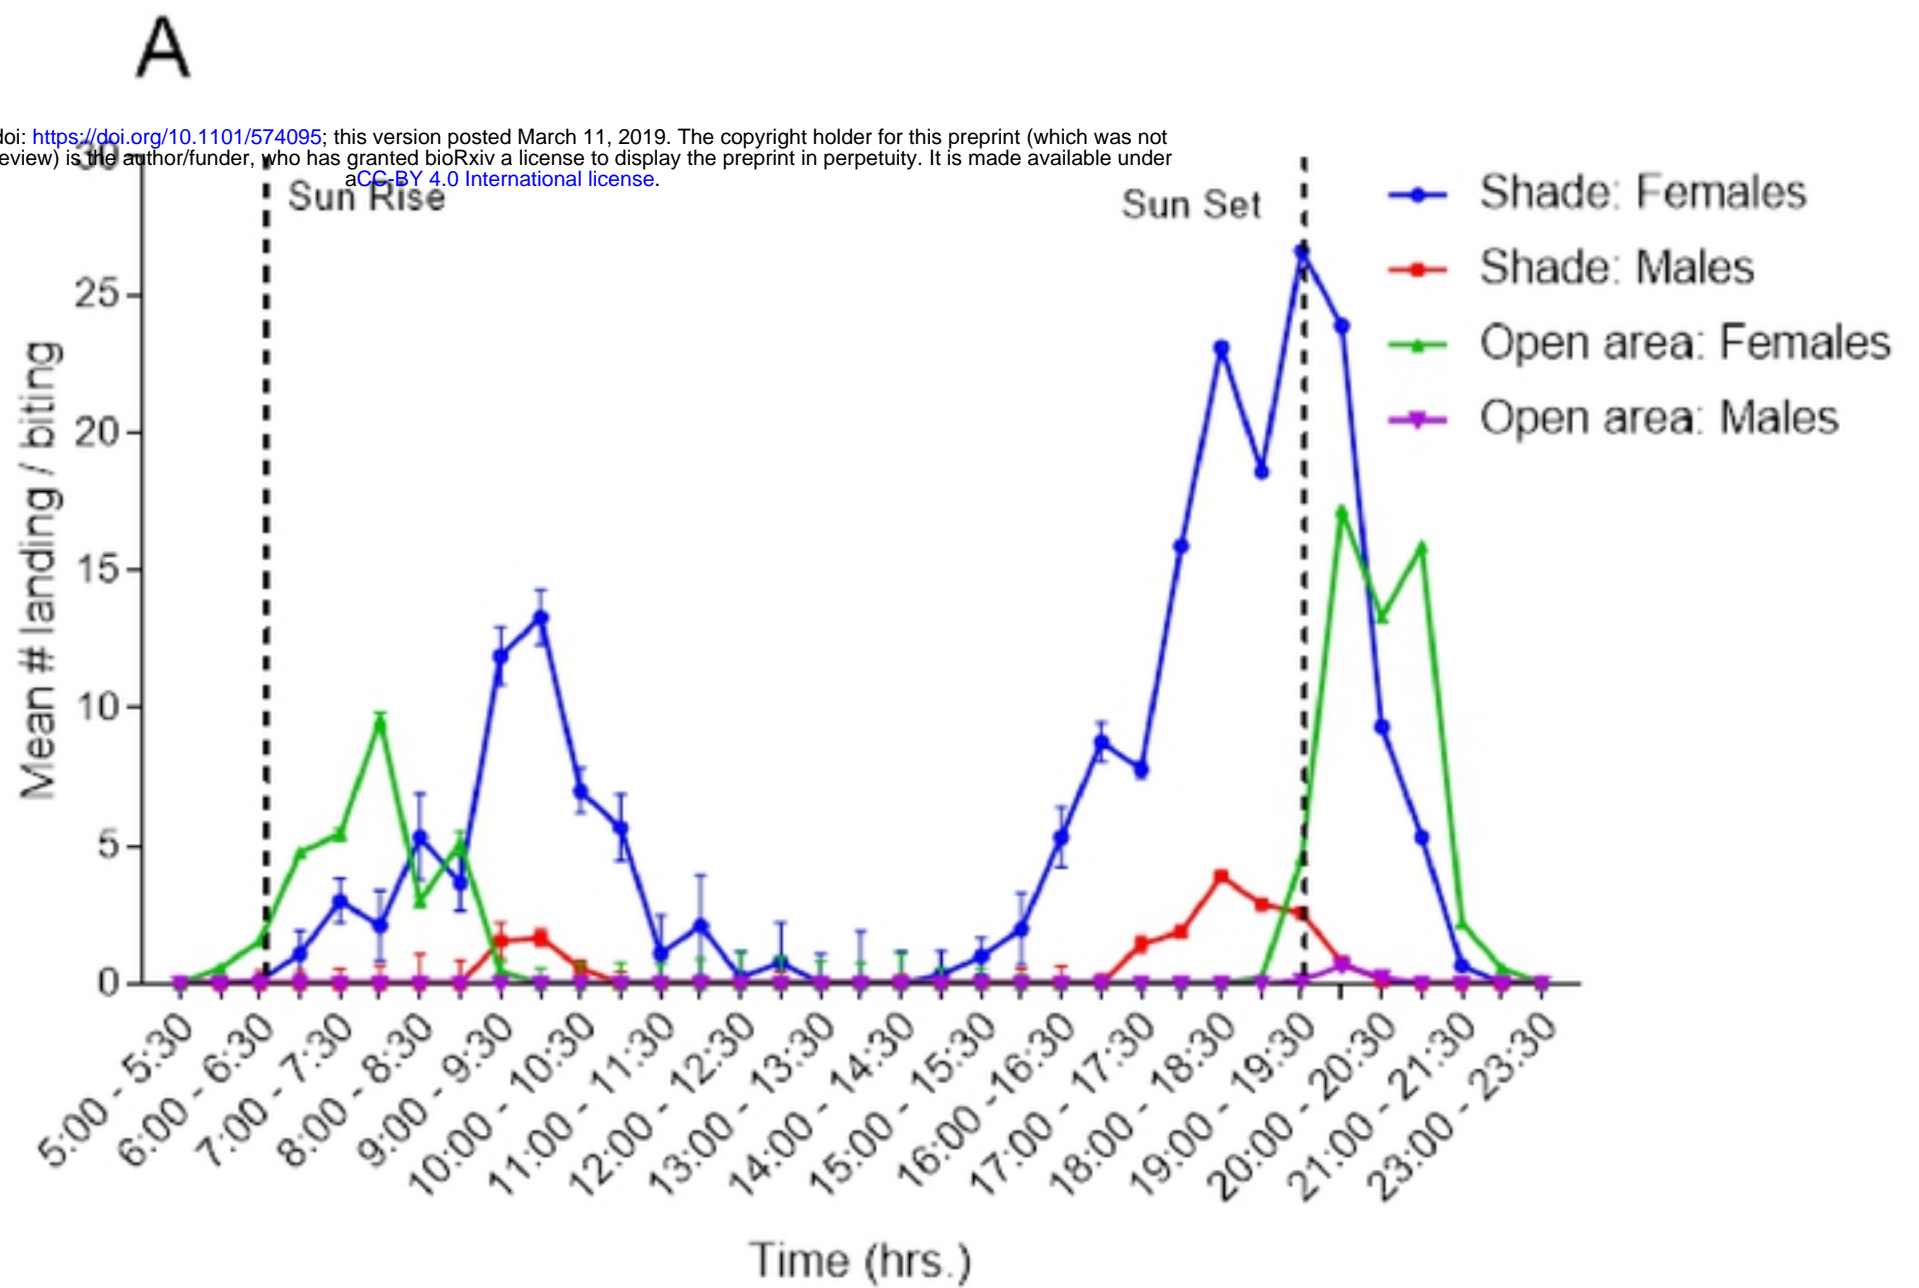

B

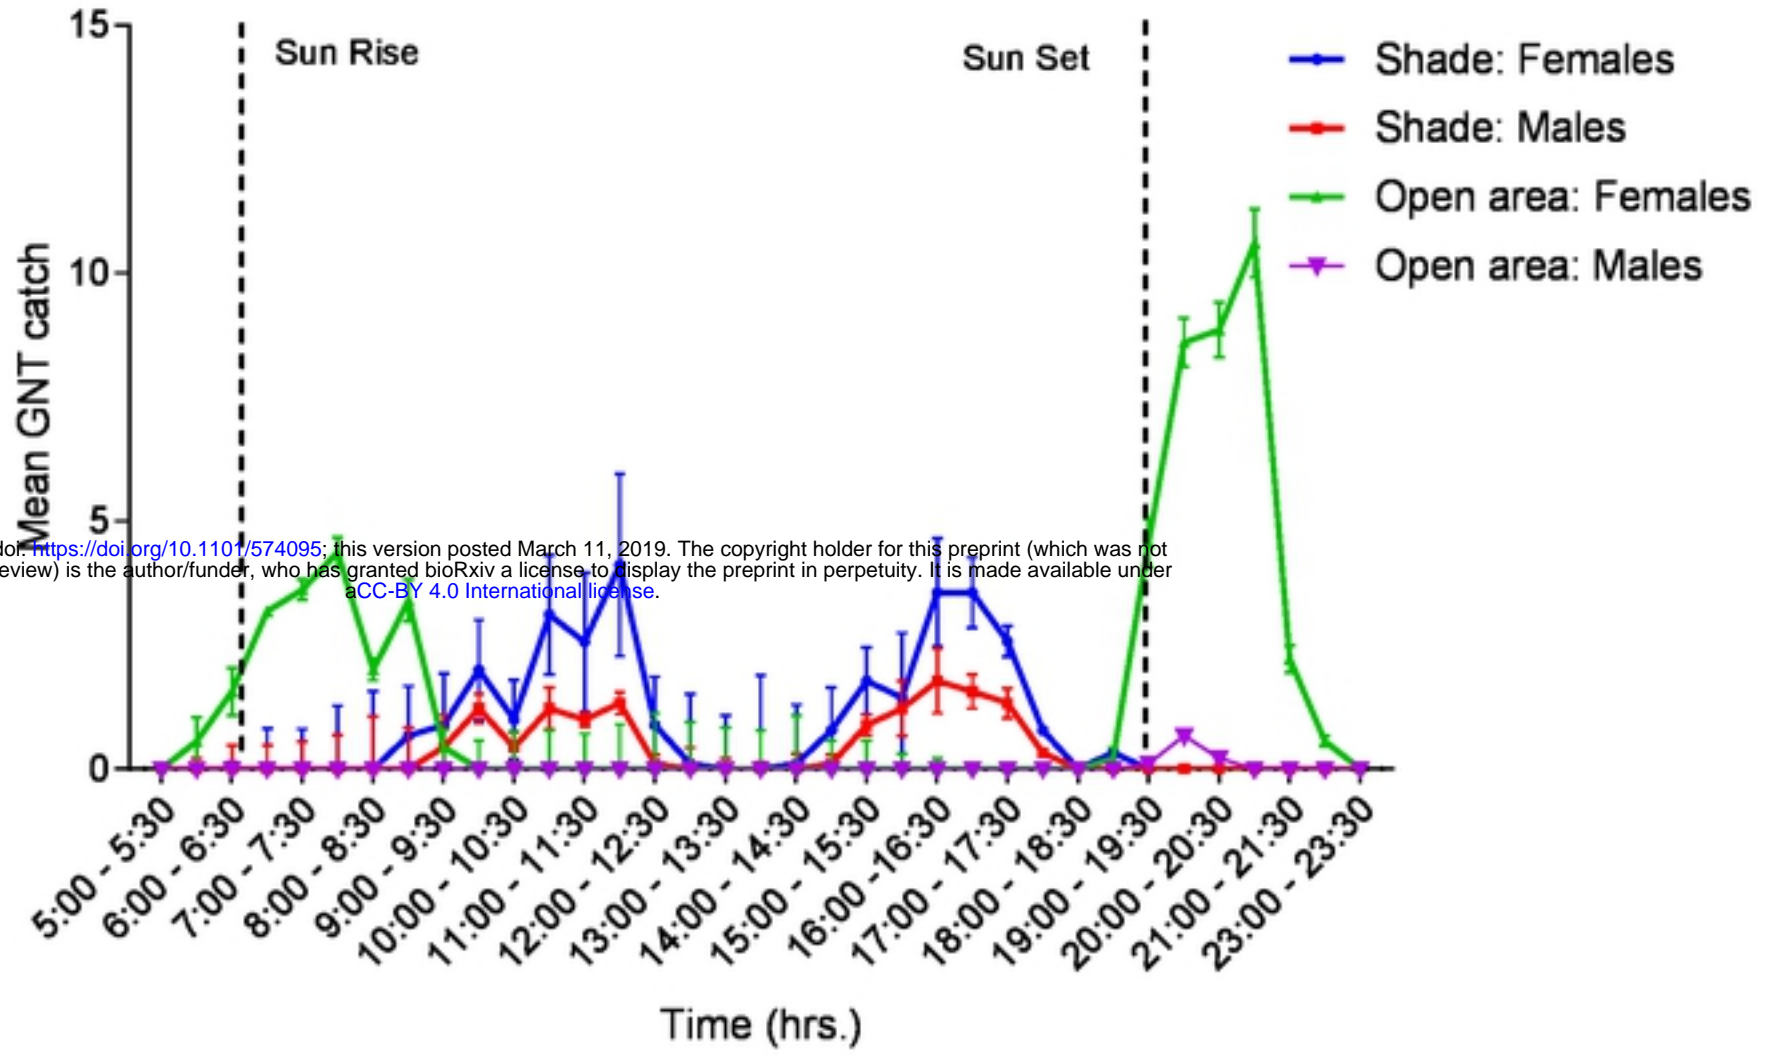

bioRxiv preprint doi: <https://doi.org/10.1101/574095>; this version posted March 11, 2019. The copyright holder for this preprint (which was not certified by peer review) is the author/funder, who has granted bioRxiv a license to display the preprint in perpetuity. It is made available under aCC-BY 4.0 International license.

**Fig 4. Survival in a series of female *Ae. aegypti* that were each exposed for 31 days to one type of plant. (A) Survival after exposure to branches with plant blossoms. *Ricinus communis* baits were branches with extra-floral nectaries. (B) Sugar source types other than blossoms.**

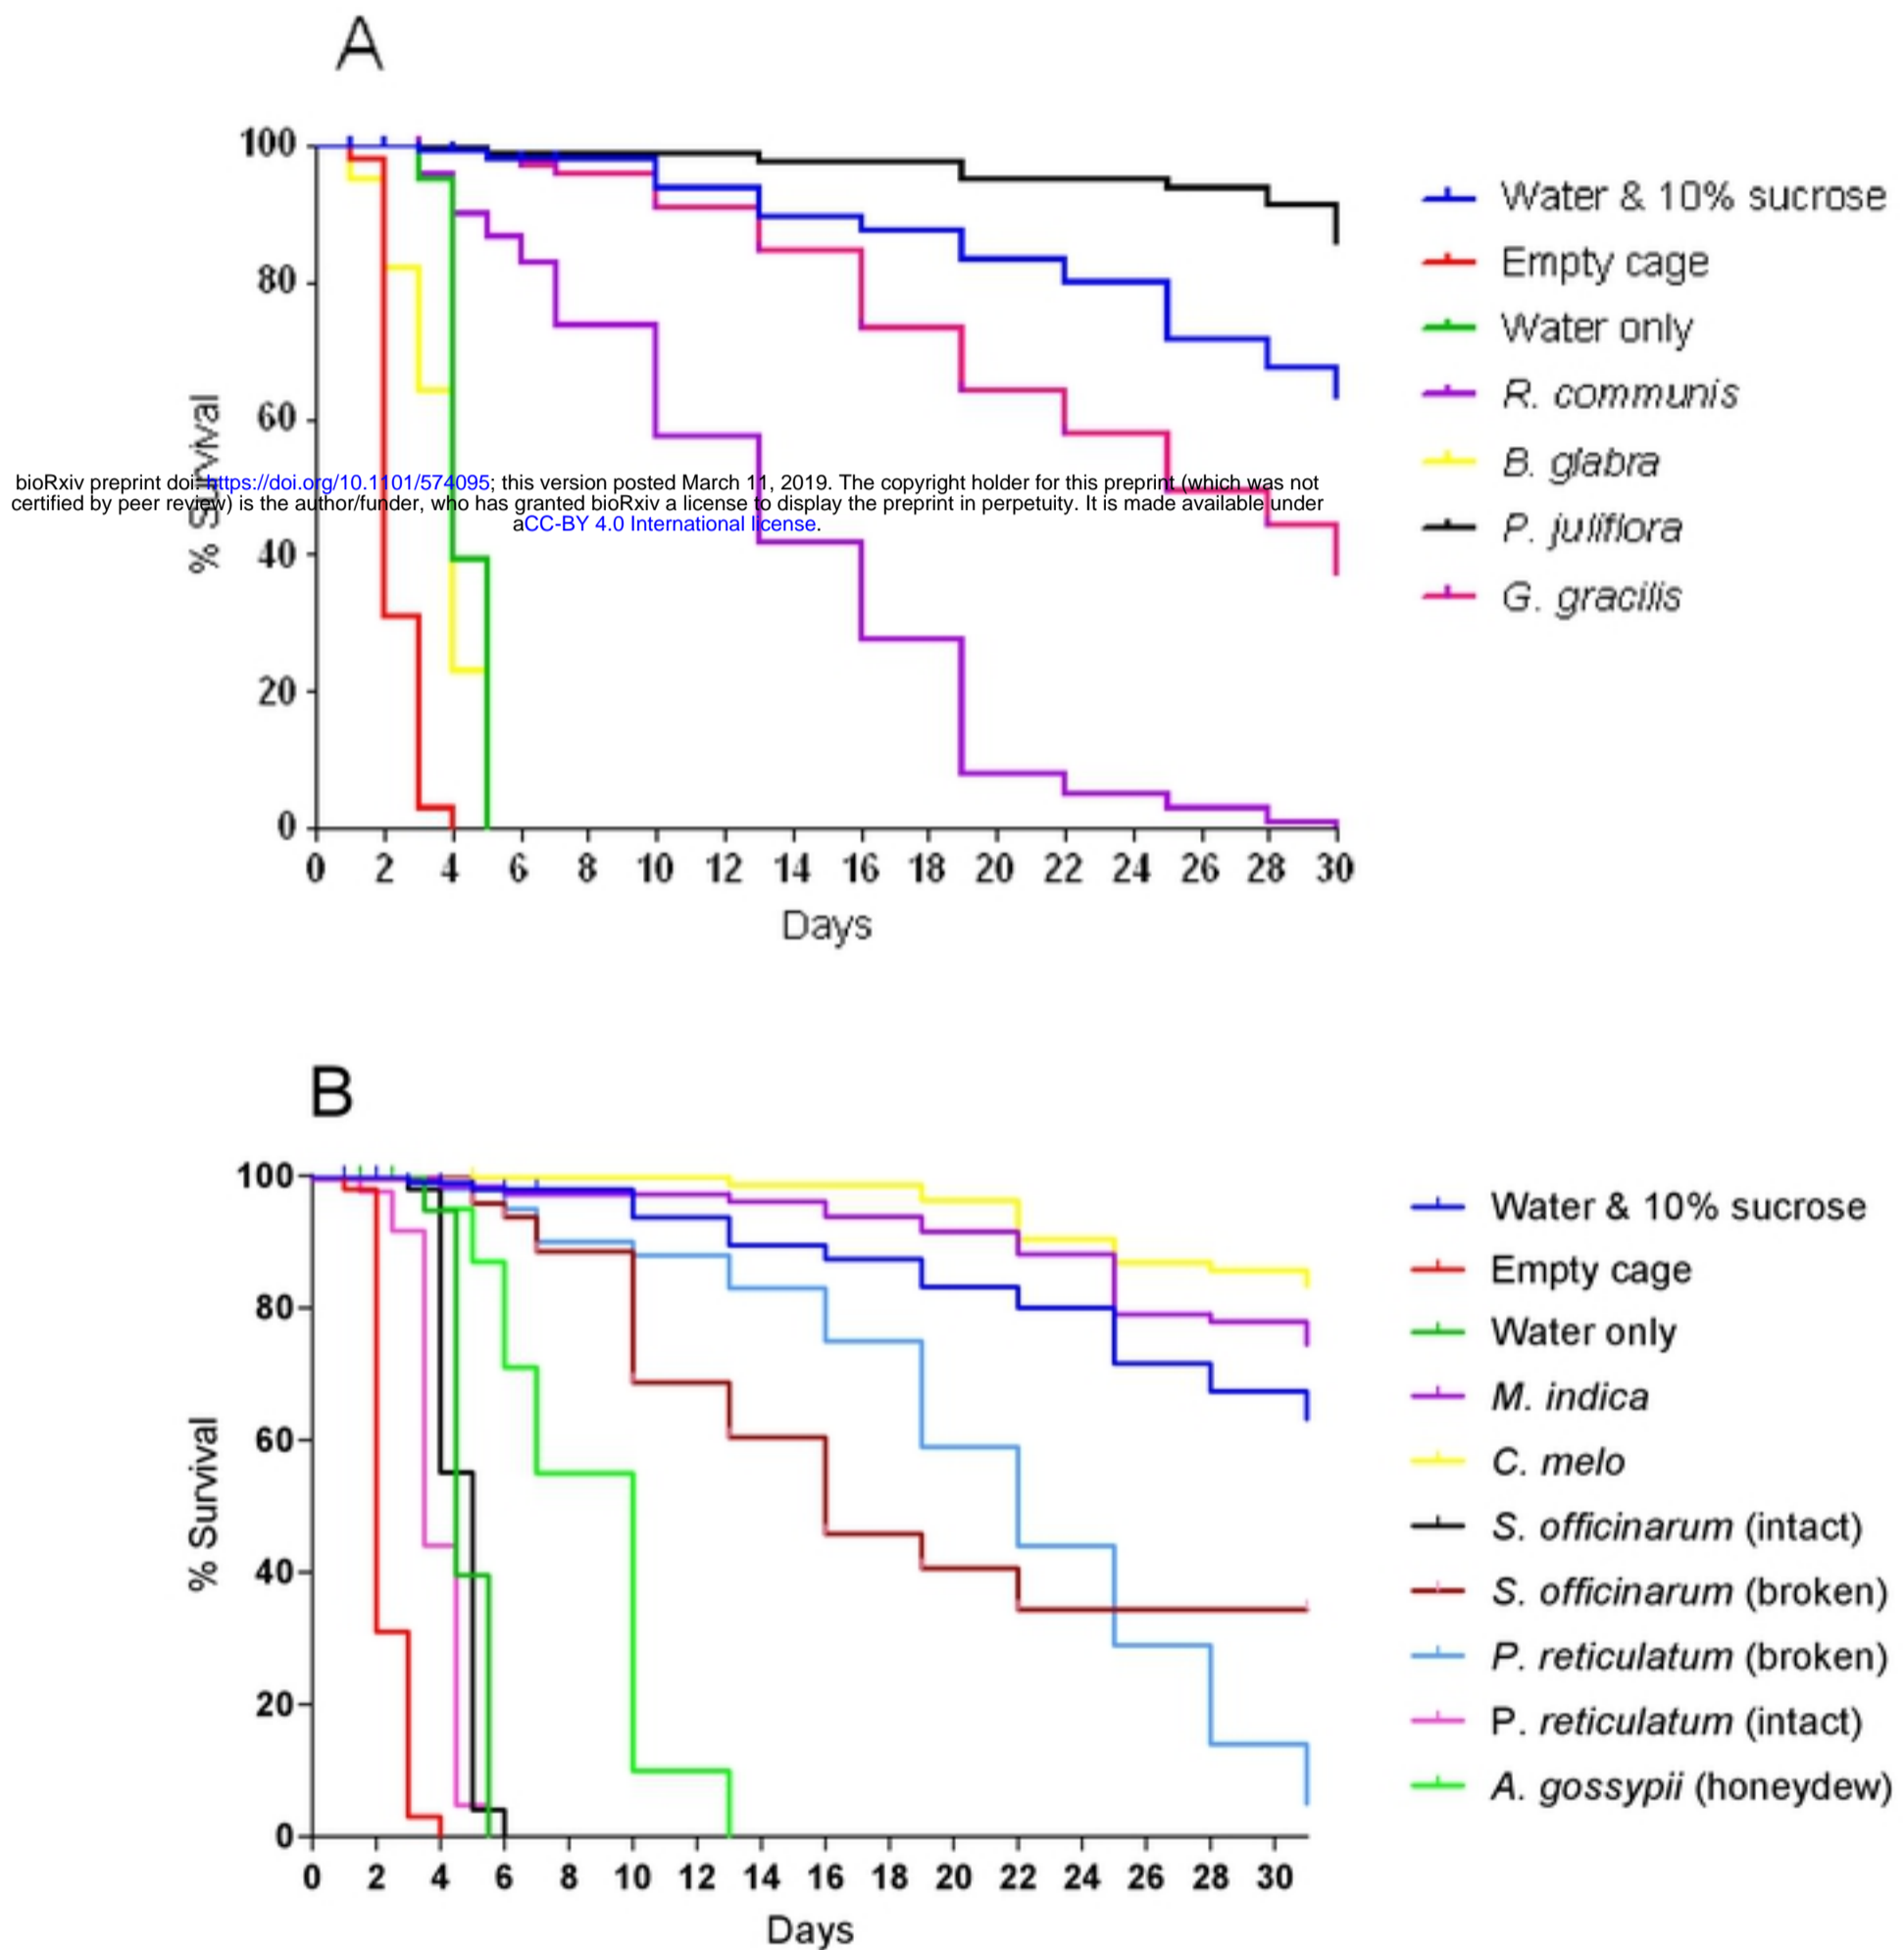

Figure 4

**Fig 6. Percentage of sugar positive mosquitoes from the catch on volunteers and from resting habitat sweep-net catches at sugar rich (SR) and sugar poor (SP) sites. (A) Tested for sugar within 1 hour after collection and (B) 6 hours after collection.**

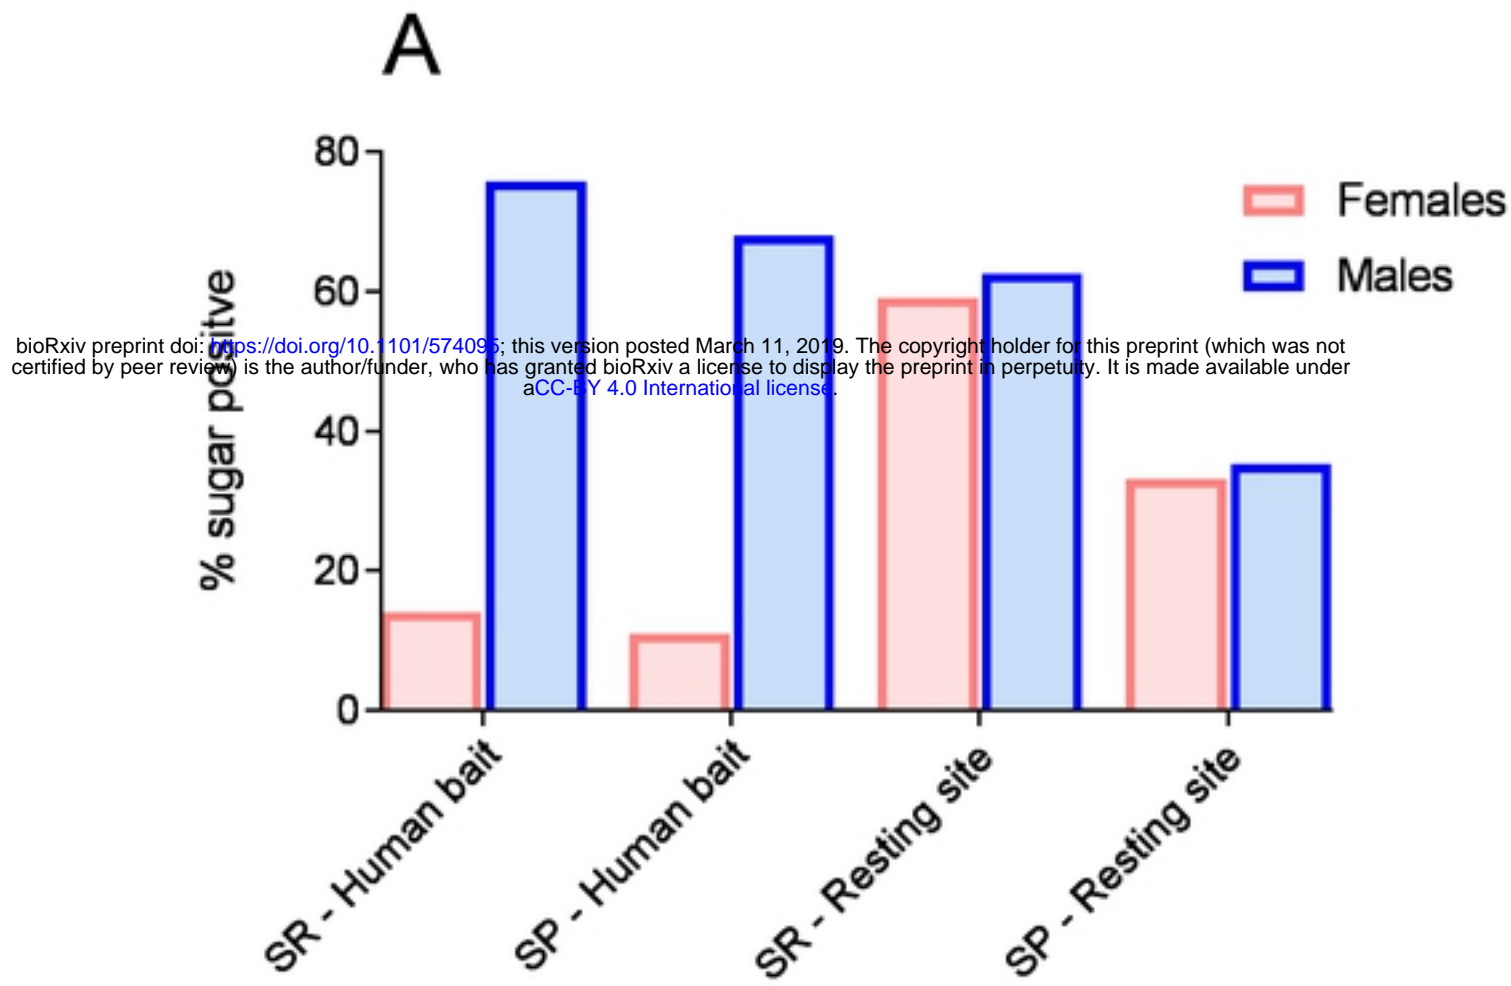

**B**

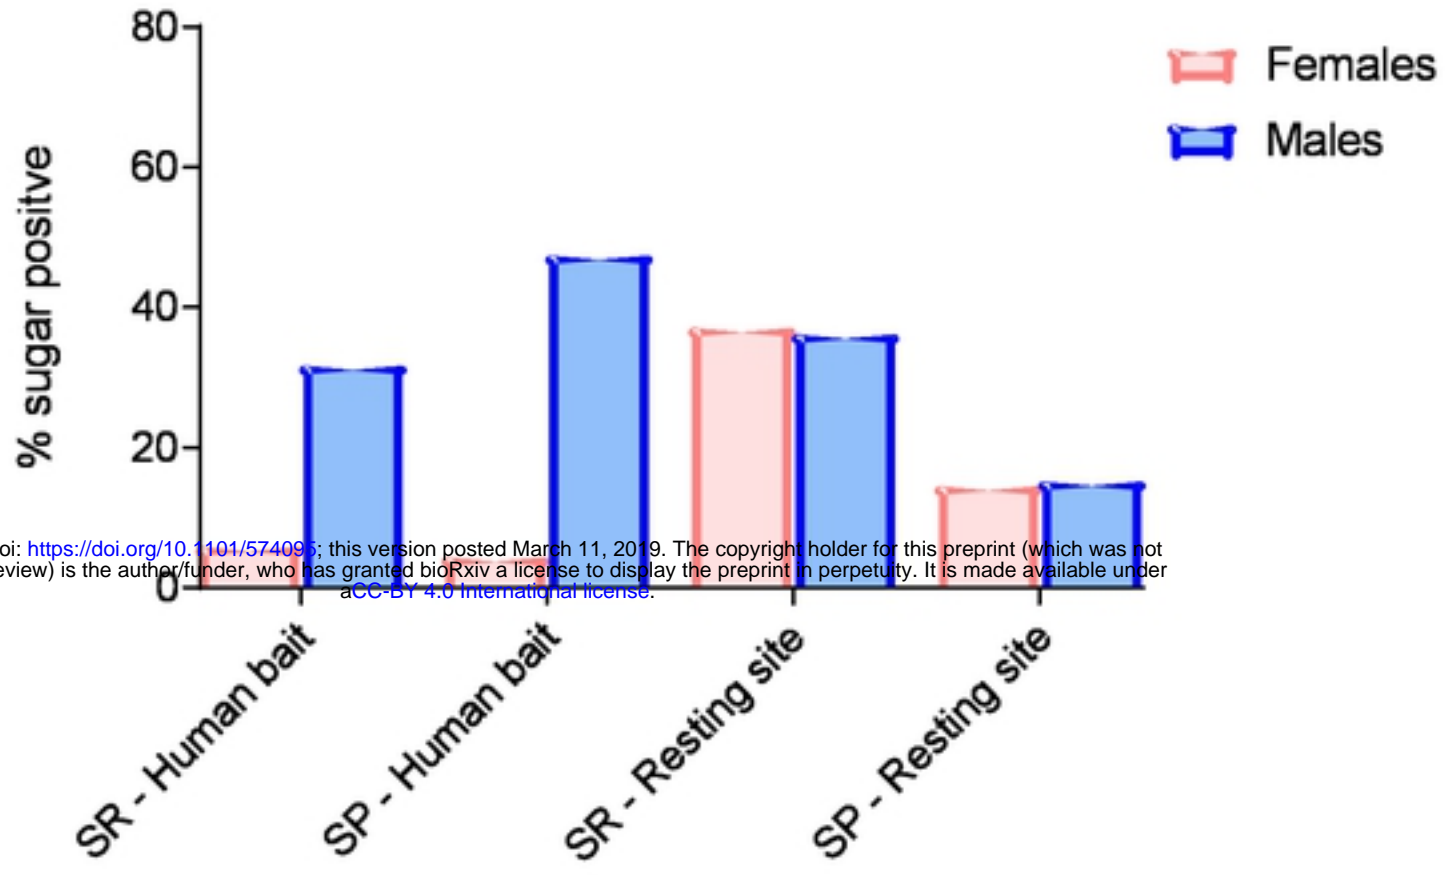

bioRxiv preprint doi: <https://doi.org/10.1101/574096>; this version posted March 11, 2019. The copyright holder for this preprint (which was not certified by peer review) is the author/funder, who has granted bioRxiv a license to display the preprint in perpetuity. It is made available under aCC-BY 4.0 International license.



**Fig 7. Reduction of *Ae. aegypti* female population following ATSB treatment.** Results are shown as the reduction in mean number of landing/biting attempts per 30-minute interval for the treatment and control sites. (A) Sugar rich sites. (B) Sugar poor sites.

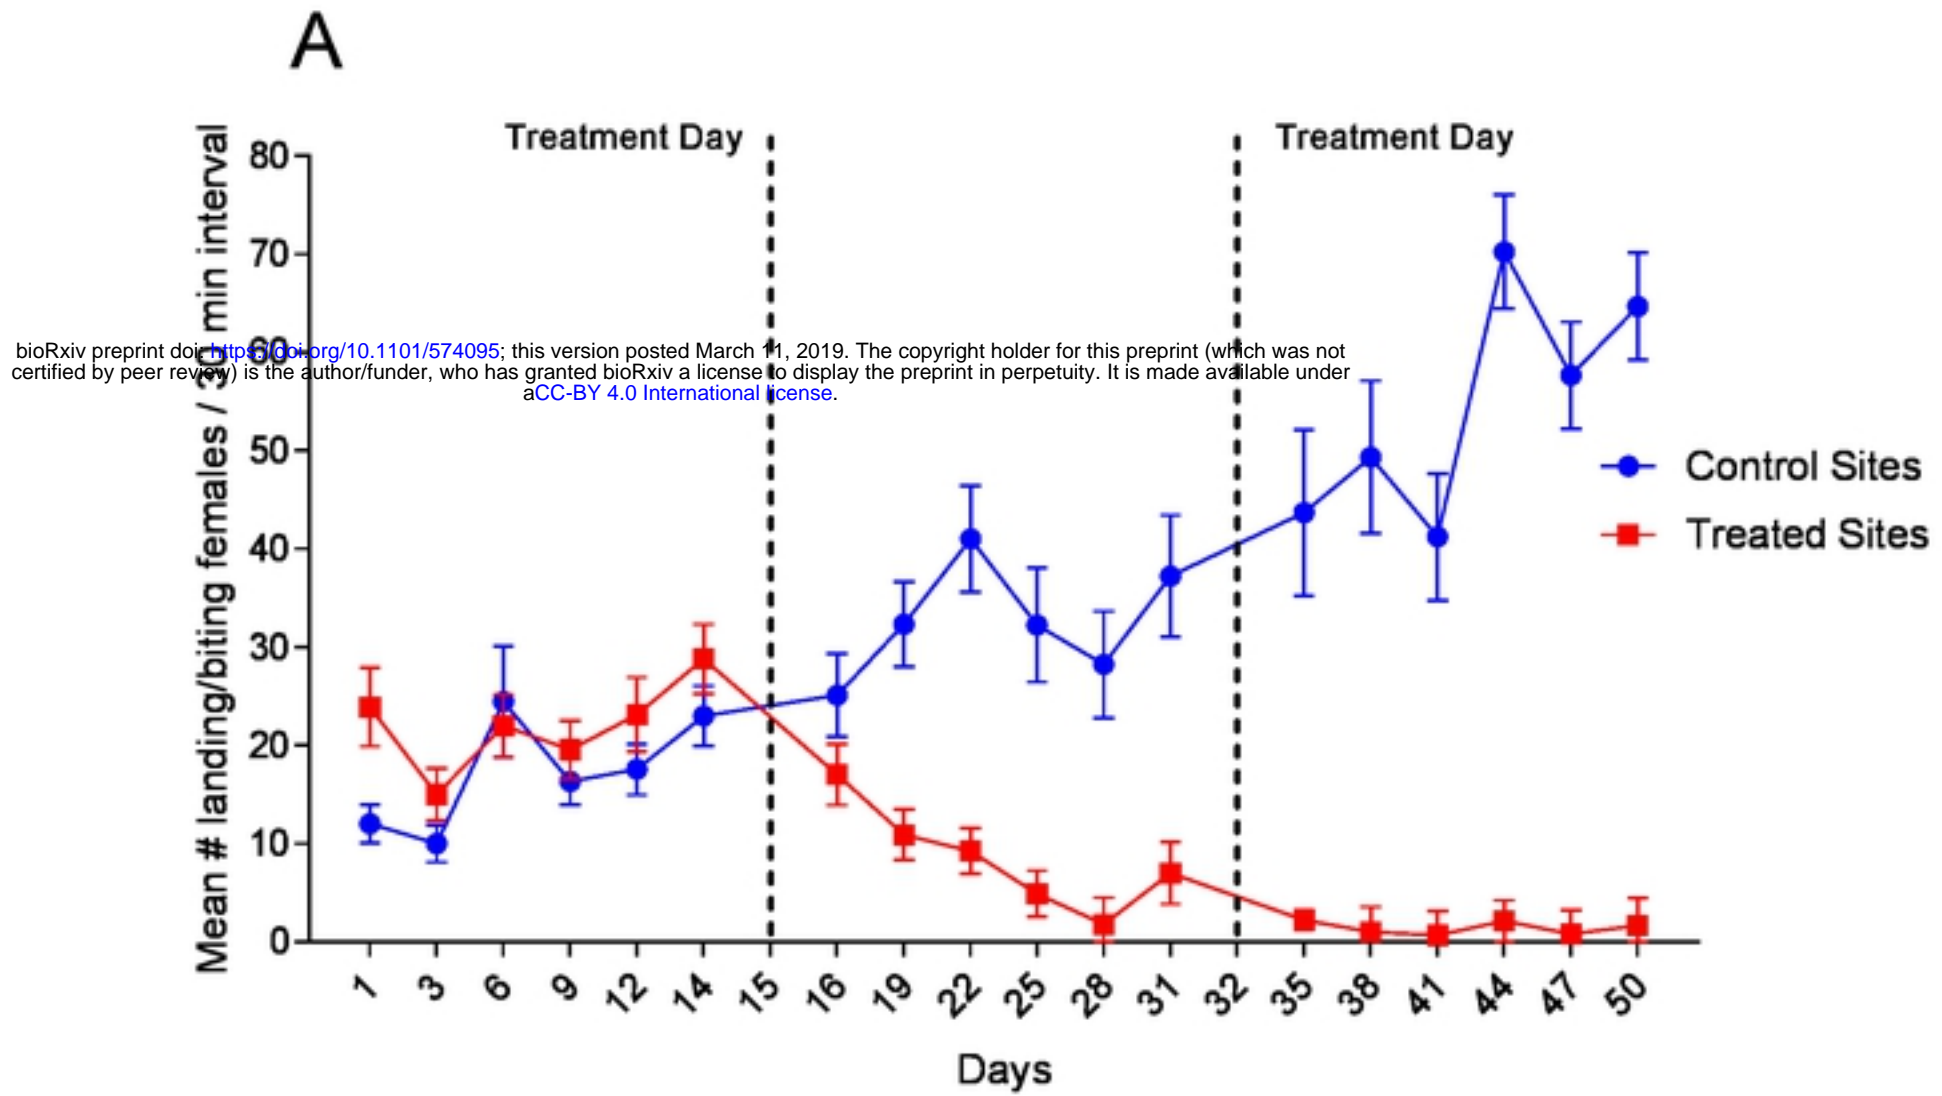

**B**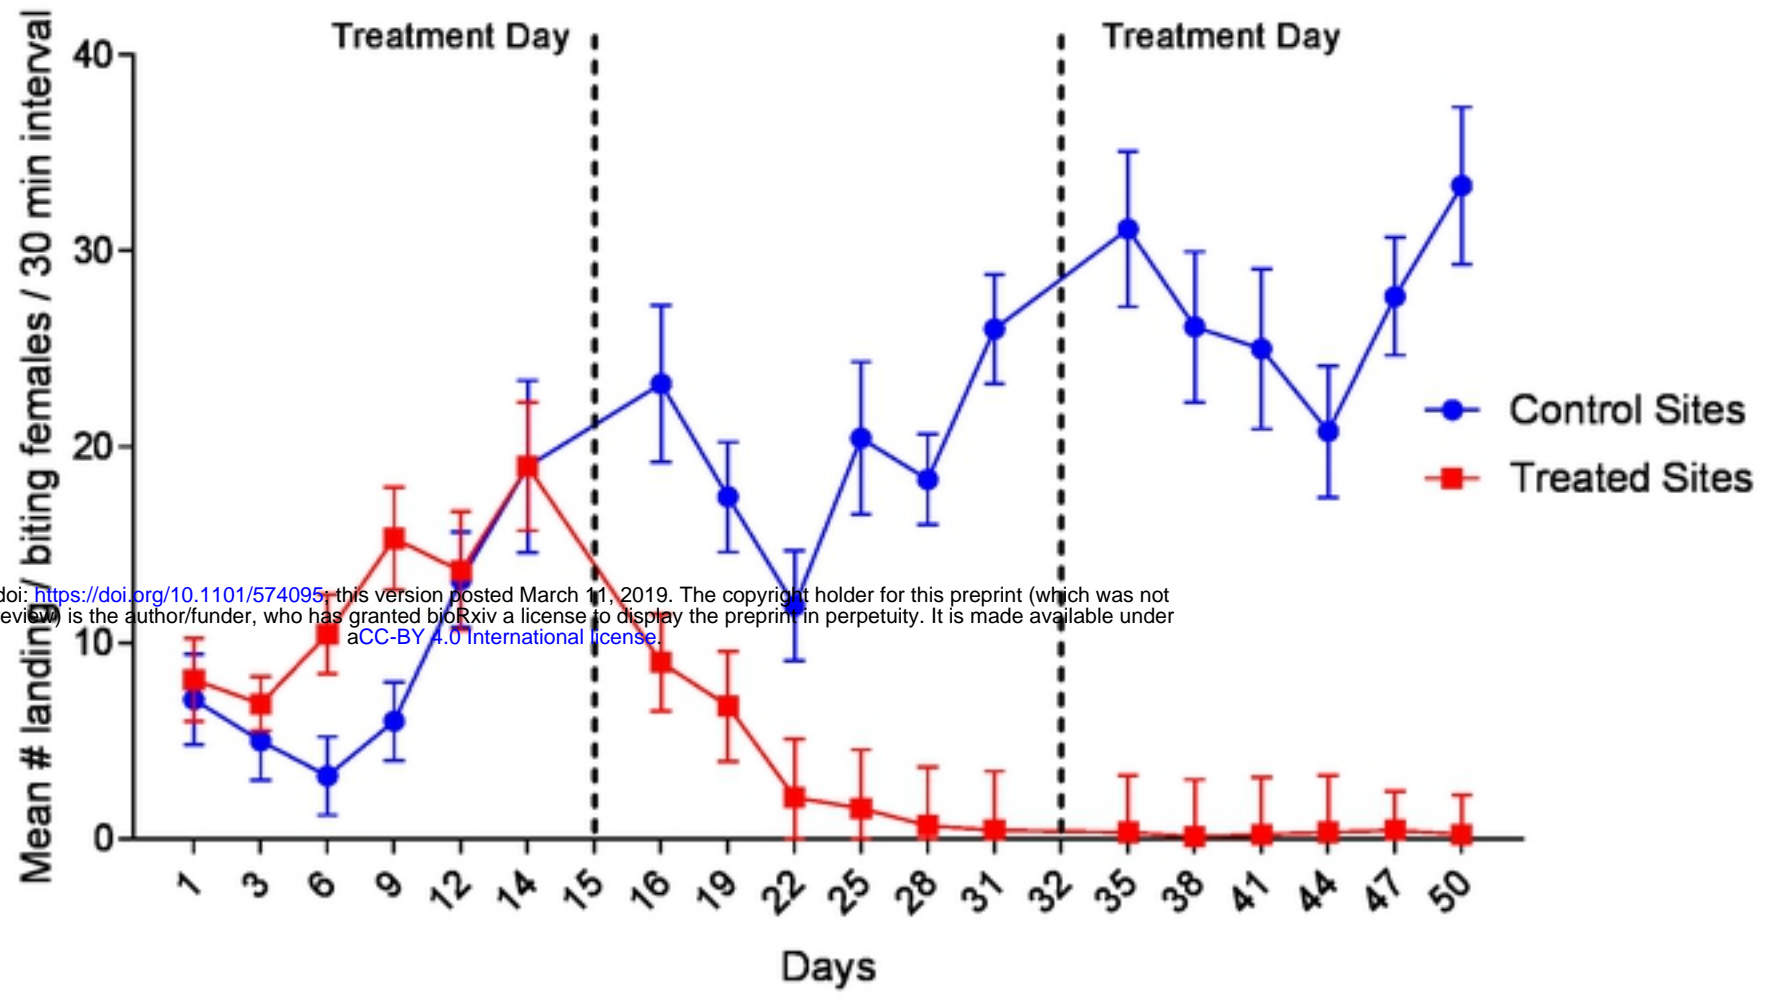

bioRxiv preprint doi: <https://doi.org/10.1101/574095>; this version posted March 11, 2019. The copyright holder for this preprint (which was not certified by peer review) is the author/funder, who has granted bioRxiv a license to display the preprint in perpetuity. It is made available under aCC-BY 4.0 International license.

**Fig 3. Local weather conditions during June and July 2016.** Weather conditions in Bamako at the time of the ATSB study. Rain occurred during the study, and two treatments were applied at the sites to avoid a “wash off” effect.

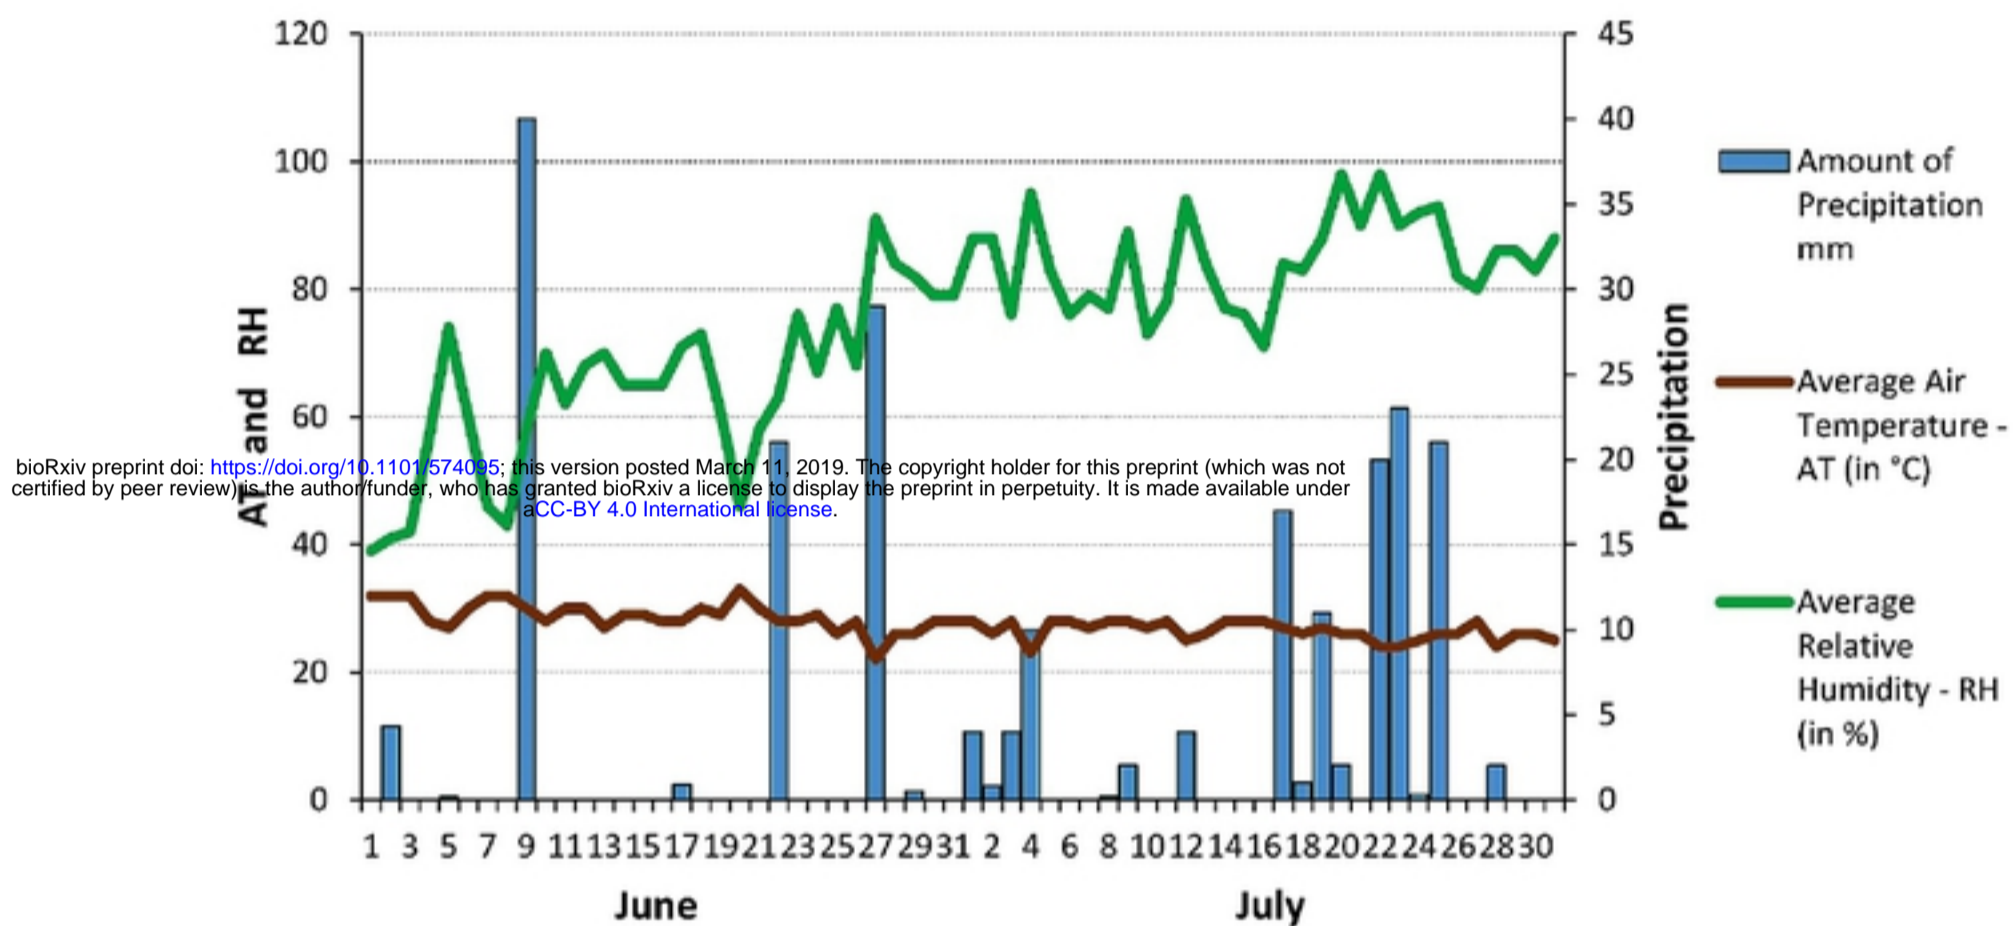

Figure 3
